# Supplementary material for: Comparative Genomics of Syntrophic Branched-Chain Fatty Acid Degrading Bacteria
Source: PubMed Central journal article supplement (PMC5017805; doi:10.1264/jsme2.me16057), 2016-07-16
Supplement: 31_288_s1.pdf [file 31_288_s1.pdf]

1 **Supplemental information**

2 **Comparative Genomics of Syntrophic Branched-Chain Fatty Acid Degrading Bacteria**

3

4 Takashi Narihiro<sup>1,2†\*</sup>, Masaru K. Nobu<sup>2†</sup>, Hideyuki Tamaki<sup>1</sup>, Yoichi Kamagata<sup>1</sup>, Yuji  
5 Sekiguchi<sup>3</sup>, and Wen-Tso Liu<sup>2</sup>

6

7 <sup>1</sup>*Bioproduction Research Institute, National Institute of Advanced Industrial Science and  
8 Technology (AIST), Central 6, Higashi 1-1-1, Tsukuba, Ibaraki 305-8566, Japan;*

9 <sup>2</sup>*Department of Civil and Environmental Engineering, University of Illinois at Urbana-  
10 Champaign, 205 North Mathews Ave, Urbana, IL 61801, USA;* <sup>3</sup>*Biomedical Research*

11 *Institute, National Institute of Advanced Industrial Science and Technology (AIST), Central 6,  
12 Higashi 1-1-1, Tsukuba, Ibaraki 305-8566, Japan*

13

14 \* Corresponding author: E-mail [t.narihiro@aist.go.jp](mailto:t.narihiro@aist.go.jp), Tel: +81-29-861-6591; Fax: +81-29-  
15 861-6587.

16 † These authors contributed equally to this work.

17

18 **Materials and Methods**

19 Clustered regularly interspaced short palindromic repeats (CRISPRs) were identified  
20 using the CRISPRs web server (6). Alignment of the translated amino acid sequences and  
21 construction of maximum likelihood (ML) trees of acyl-CoA dehydrogenase, enoyl-CoA  
22 hydratase, 3-hydroxyacyl-CoA dehydrogenase, acetyl-CoA acetyltransferase, and isobutyryl-  
23 CoA mutase were performed with the MEGA version 6.06 (5, 15). For phylogenetic  
24 comparison of genes involved in  $\beta$ -oxidation pathway, we tentatively annotated acyl-CoA  
25 dehydrogenase, enoyl-CoA hydratase, 3-hydroxyacyl-CoA dehydrogenase, and acetyl-CoA  
26 acetyltransferase genes from draft genome sequences of *Syntrophomonas palmitatica* strain

27 JCM 14374<sup>T</sup> (accession no. NZ\_BBCE00000000) and *Syntrophomonas zehnderi* strain OL-  
28 4<sup>T</sup> (NZ\_CGIH00000000) by using Prokka version 1.11 (10). The topology of the trees was  
29 estimated by 1,000 bootstrap replicates (4). The Jones-Taylor-Thornton (JTT) model and  
30 nearest-neighbor-interchange (NNI) were used for substitution model and heuristic method,  
31 respectively (7, 14).

32

## 33 **Results and Discussion**

### 34 *Genome statistics*

35 The quality of the genome of “*Syntrophomonas wolfei* subsp. *methylbutyratica*” strain  
36 4J5, *Syntrophomonas wolfei* subsp. *wolfei* strain Göttingen, and *Syntrophothermus*  
37 *lipocalidus* strain TGB-C1 seems to be high (>97%) enough for the comparative genomics  
38 (Table S1). Approximately 1,800 genes of the strain 4J5 were highly homologous (>90%  
39 amino acid identity) to Göttingen genes, whereas approximately 1,000 genes of the strains  
40 4J5 and Göttingen have significant amino acid identity (>70%) with the genes of strain TGB-  
41 C1 (Fig. S3).

42

### 43 *Central metabolism, physiology, and transport systems*

44 In accordance with the genome of strain Göttingen (11), the 4J5 and TGB-C1  
45 genomes encode the Embden–Meyerhof pathway, pentose phosphate pathway, partial  
46 tricarboxylic acid (TCA) cycle, citrate (Re)-synthase gene cluster, and co-factor biosynthesis  
47 for central metabolism (Table S2). Bacterial core RNA polymerase (*rpoA*, *rpoB*, *rpoC*, and  
48 *rpoZ*) with sigma factors including general primary 70 factors (*rpoD*), heat stress factors  
49 (*rpoE*), a flagella biogenesis factor (*fliA*, *rpoF*), and a nitrogen-limitation 54 factor (*rpoN*) are  
50 identified in both of the strains. The RNA genes (rRNA and tRNA) were also found (Table  
51 S7). To cope with disturbances of environmental conditions, the strain 4J5 genome encodes

52 thioresdoxin, rubrerythrin, superoxide dismutase, and molecular chaperone systems. The strain  
53 TGB-C1 genome harbors these systems, except for superoxide dismutase.

54 The genes encoding flagellum components, type IV pilus synthesis, chemotaxis, and  
55 sporulation are found in the genomes. In addition, all of the genes required for synthesis and  
56 metabolize poly- $\beta$ -hydroxyalkanoate (PHA) are found in the 4J5 genome, but not in the  
57 TGB-C1 genome. The PHA granules have been observed in the cells of the strain 4J5 under  
58 electron microscopic observation (16), implying that the strain 4J5 may utilize PHA under  
59 thermodynamically unfavorable conditions for the degradation of VFAs and BCFAs as  
60 suggested by previous culture- and genome-based studies on the strain Göttingen (1, 2, 8, 11).  
61 We found the genes associated with clustered regularly interspaced short palindromic repeat  
62 (CRISPR) within the genomes (Table S7). Although CRISPR is known as acquired immune  
63 system against phages (12, 13), the ecological role of the CRISPRs observed in the syntroph  
64 genomes remains obscure due to the absence of comprehensive study on CRISPR dynamics  
65 in methanogenic ecosystem.

66 A total of 105 and 68 genes/gene clusters involved in transportation, secretion, and  
67 drug resistance are found in the strain 4J5 and TGB-C1 genomes, respectively (Table S3). For  
68 example, there are tungstate, molybdate, ferrous iron, zinc, cobalt, phosphate, sodium,  
69 potassium, amino acids, and monosaccharides transporters. The strains Göttingen, 4J5, and  
70 TGB-C1 shared almost all of the transport/secretion systems with some exceptions; for  
71 example, ammonia transporters (Slip\_1571 and Slip\_2119) were found only in the strain  
72 TGB-C1, suggesting that *Syntrophothermus lipocalidus* possesses nitrogen-associated  
73 physiological function (discussed in main text).

74

75

Table S1. Genome statistics

| Attribute                      | <i>Syntrophomonas wolfei</i><br>subsp. <i>metylbutyratica</i><br>strain 4J5 | <i>Syntrophomonas wolfei</i><br>subsp. <i>wolfei</i> strain<br>Göttingen | <i>Syntrophothermus</i><br><i>lipocalidus</i> strain TGB-<br>C1 |
|--------------------------------|-----------------------------------------------------------------------------|--------------------------------------------------------------------------|-----------------------------------------------------------------|
| Reference                      | This study                                                                  | (11)                                                                     | (3)                                                             |
| Status                         | Draft                                                                       | Complete                                                                 | Complete                                                        |
| DNA scaffold                   | 89                                                                          | 1                                                                        | 1                                                               |
| DNA, total (bp)                | 3,194,001                                                                   | 2,936,195                                                                | 2,405,559                                                       |
| DNA, G+C content               | 45.55%                                                                      | 44.87%                                                                   | 50.99%                                                          |
| Genes total number             | 3,073                                                                       | 2,677                                                                    | 2,440                                                           |
| Protein coding genes           | 2,964 (96.5%)                                                               | 2,574 (96.2%)                                                            | 2,385 (97.8%)                                                   |
| RNA genes                      | 54                                                                          | 65                                                                       | 55                                                              |
| rRNA genes                     | 11                                                                          | 19                                                                       | 6                                                               |
| tRNA genes                     | 43                                                                          | 46                                                                       | 46                                                              |
| Genes with function prediction | 2,184 (73.7%)                                                               | 1,507 (57.1%)                                                            | 1,726 (70.74%)                                                  |
| CRISPR                         |                                                                             |                                                                          |                                                                 |
| Site number                    | 2                                                                           | 5                                                                        | 2                                                               |
| Spacer number                  | 63, 126                                                                     | 3, 15, 36, 61, 185                                                       | 119, 152                                                        |
| Genome quality                 |                                                                             |                                                                          |                                                                 |
| Completeness                   | 97.35%                                                                      | 97.35%                                                                   | 98.81%                                                          |
| Contamination                  | 0.04%                                                                       | 0.21%                                                                    | 0.51%                                                           |

Table S2. *Syntrophomonas wolfei* subsp. *mevibutyratica* strain 4J5<sup>T</sup> genes relevant to general function.

| Locus Tag                               | Gene Product Name                                                   | BLAST top hit in <i>Syntrophomonas wolfei</i> strain Goettingen                                    |              | BLAST top hit in <i>Syntrophomonas lipocalidis</i> strain TGB-C1 |                                                                                                    |              |         |
|-----------------------------------------|---------------------------------------------------------------------|----------------------------------------------------------------------------------------------------|--------------|------------------------------------------------------------------|----------------------------------------------------------------------------------------------------|--------------|---------|
|                                         |                                                                     | Gene ID and annotation                                                                             | Identity (%) | e-Value                                                          | Gene ID and annotation                                                                             | Identity (%) | e-Value |
| <b>Glycolysis / TCA cycle</b>           |                                                                     |                                                                                                    |              |                                                                  |                                                                                                    |              |         |
| SWMB_00127                              | glkA, glucose                                                       | 638137153 Swol_0259 glucokinase (EC 2.7.1.2)                                                       | 93.2         | 0                                                                | 646854887 Slip_1859 glucokinase (EC 2.7.1.2)                                                       | 43.6         | 2E-61   |
| SWMB_00126                              | pgi-pmi; glucosyl/inositol-6-phosphate isomerase                    | 638138500 Swol_0260 bifunctional phosphoglucoase/phosphomannose isomerase (EC 5.3.1.8; EC 5.3.1.9) | 95.6         | 0                                                                | 646854886 Slip_1858 bifunctional phosphoglucoase/phosphomannose isomerase (EC 5.3.1.8; EC 5.3.1.9) | 59.1         | 8E-46   |
| SWMB_00515                              | glpK, fructose-1,6-bisphosphatase II                                | 638139293 Swol_2409 hypothetical protein                                                           | 98.2         | 0                                                                | 646855333 Slip_2308 fructose-1,6-bisphosphatase, class II                                          | 76.9         | 0       |
| SWMB_02090                              | pfkA, PFK, 6-phosphofruktokinase I                                  | 638139023 pfkA 6-phosphofruktokinase (EC 2.7.1.11)                                                 | 97.8         | 0                                                                | 646854513 pfkA 6-phosphofruktokinase (EC 2.7.1.11)                                                 | 60.8         | 6E-133  |
| SWMB_02719                              | pfkB, PFK, 6-phosphofruktokinase I                                  | 638139030 pfkB 6-phosphofruktokinase (EC 2.7.1.11)                                                 | 98.1         | 0                                                                | 646854145 pfkB 6-phosphofruktokinase (EC 2.7.1.11)                                                 | 67.9         | 2E-166  |
| SWMB_00513                              | FBA, fbaA, fructose-bisphosphate aldolase, class II                 | 638139295 Swol_2411 fructose-bisphosphate aldolase (EC 4.12.1.3)                                   | 97.9         | 0                                                                | 646855335 Slip_2310 fructose-bisphosphate aldolase (EC 4.1.2.13)                                   | 78.8         | 6E-166  |
| SWMB_00112                              | TPI, tpiA, triosephosphate isomerase (TIM)                          | 638137167 tpiA triosephosphate isomerase (EC 5.3.1.1)                                              | 92.8         | 0                                                                | 646854878 tpiA triosephosphate isomerase (EC 5.3.1.1)                                              | 54.4         | 8E-93   |
| SWMB_00114                              | GAPDH, gapA, glyceraldehyde 3-phosphate dehydrogenase               | 638137166 Swol_0272 glyceraldehyde 3-phosphate dehydrogenase (NAD <sup>+</sup> ) (EC 1.2.1.12)     | 98.5         | 0                                                                | 646854880 Slip_1852 glyceraldehyde 3-phosphate dehydrogenase (NAD <sup>+</sup> ) (EC 1.2.1.12)     | 58.5         | 3E-147  |
| SWMB_00113                              | PKC, pck, phosphoglycerate kinase                                   | 638137166 pck phosphoglycerate kinase (EC 2.7.2.3)                                                 | 98.4         | 0                                                                | 646854879 pck phosphoglycerate kinase (EC 2.7.2.3)                                                 | 59.5         | 4E-175  |
| SWMB_00111                              | gpmI, 2,3-bisphosphoglycerate-independent phosphoglycerate mutase   | 638137165 gpmI phosphoglycerate mutase (EC 5.4.2.1)                                                | 95.5         | 0                                                                | 646854877 gpmI phosphoglycerate mutase (EC 5.4.2.1)                                                | 68.4         | 0       |
| SWMB_00845                              | apM, 2,3-bisphosphoglycerate-independent phosphoglycerate mutase    | 638138180 Swol_1301 phosphoglycerate mutase (EC 5.4.2.1)                                           | 94.8         | 0                                                                | 646853321 Slip_0290 phosphoglycerate mutase (EC 5.4.2.1)                                           | 56.1         | 3E-166  |
| SWMB_00110                              | ENO, eno, enolase; phosphopyruvate hydratase                        | 638137169 eno enolase (EC 4.2.1.11)                                                                | 97.7         | 0                                                                | 646854876 eno enolase (EC 4.2.1.11)                                                                | 73.5         | 0       |
| SWMB_02089                              | pyk, pyruvate kinase                                                | 638138922 Swol_2040 pyruvate kinase (EC 2.7.1.40)                                                  | 97.9         | 0                                                                | 646854732 Slip_1701 pyruvate kinase (EC 2.7.1.40)                                                  | 61.7         | 0       |
| SWMB_02328                              | pyruvate, phosphopyruvate kinase                                    | 638138392 Swol_1512 pyruvate phosphate dikinase (EC 2.7.9.1)                                       | 96.5         | 0                                                                | 646854654 Slip_1625 pyruvate phosphate dikinase (EC 2.7.9.1)                                       | 75.2         | 0       |
| SWMB_02693                              | pyruvate, pyruvate carboxylase                                      | 638137403 Swol_0519 pyruvate carboxylase, PYKA                                                     | 97.6         | 0                                                                | 646853453 Slip_0423 CoA-carboxylase, biotin carboxylase                                            | 48.6         | 6E-129  |
| SWMB_02193                              | hydro-lyases, Fe-S type, tartarate/fumarate subfamily, beta region  | 638138505 Swol_1628 Fumarate hydratase beta subunit                                                | 98.1         | 1E-150                                                           | 646855078 Slip_2051 hydro-lyase, Fe-S type, tartarate/fumarate subfamily, beta subunit             | 35.0         | 3E-29   |
| SWMB_02194                              | hydro-lyases, Fe-S type, tartarate/fumarate subfamily, alpha region | 638138506 Swol_1629 Fumarate hydratase alpha subunit                                               | 95.1         | 0                                                                | 646855079 Slip_2052 hydro-lyase, Fe-S type, tartarate/fumarate subfamily, alpha subunit            | 30.6         | 2E-36   |
| SWMB_01460                              | DL-D, pdhI, dihydrolipoamide dehydrogenase                          | 638138860 Swol_1978 dihydrolipoamide dehydrogenase (EC 1.8.1.4)                                    | 94.4         | 0                                                                | 646855207 Slip_2184 dihydrolipoamide dehydrogenase (EC 1.8.1.4)                                    | 39.4         | 3E-102  |
| SWMB_00330                              | korD, 2-oxoglutarate ferredoxin oxidoreductase subunit delta        | 638138281 Swol_1401 4Fe-4S ferredoxin, iron-sulfur binding                                         | 37.1         | 3E-11                                                            | 646855091 Slip_0043 4Fe-4S ferredoxin iron-sulfur binding domain protein                           | 69.0         | 7E-40   |
| SWMB_00331                              | korC, 2-oxoglutarate ferredoxin oxidoreductase subunit gamma        | 638138283 Swol_0038 2-oxoglutarate ferredoxin oxidoreductase, gamma subunit (EC 1.2.2.3)           | 95.9         | 6E-135                                                           | 646853090 Slip_0042 Pyruvate/ketoglutarate oxidoreductase                                          | 65.1         | 6E-87   |
| SWMB_00332                              | korB, 2-oxoglutarate ferredoxin oxidoreductase subunit beta         | 638138284 Swol_0037 2-oxoglutarate ferredoxin oxidoreductase, beta subunit (EC 1.2.2.3)            | 100.0        | 0                                                                | 646853089 Slip_0041 thiamine pyrophosphate protein domain protein TPP-binding protein              | 79.3         | 7E-159  |
| SWMB_00333                              | korA, 2-oxoglutarate ferredoxin oxidoreductase subunit alpha        | 638138285 Swol_0036 putative keto-oxoal ferredoxin oxidoreductase, alpha subunit                   | 98.3         | 0                                                                | 646853088 Slip_0040 pyruvate flavodoxin/ferredoxin oxidoreductase domain protein                   | 77.4         | 0       |
| SWMB_00728                              | korD, 2-oxoglutarate ferredoxin oxidoreductase subunit delta        | 638138281 Swol_1401 4Fe-4S ferredoxin, iron-sulfur binding                                         | 93.0         | 3E-45                                                            | 646854802 Slip_1773 4Fe-4S ferredoxin iron-sulfur binding domain protein                           | 59.1         | 1E-26   |
| SWMB_00729                              | korA, 2-oxoglutarate ferredoxin oxidoreductase subunit alpha        | 638138280 Swol_1400 2-oxo-oxoal ferredoxin oxidoreductase, alpha subunit                           | 97.7         | 0                                                                | 646854801 Slip_1772 pyruvate flavodoxin/ferredoxin oxidoreductase domain protein                   | 58.7         | 2E-93   |
| SWMB_00730                              | korB, 2-oxoglutarate ferredoxin oxidoreductase subunit beta         | 638138279 Swol_1399 putative keto-oxoal ferredoxin oxidoreductase, beta subunit                    | 98.4         | 0                                                                | 646854800 Slip_1771 thiamine pyrophosphate protein domain protein TPP-binding protein              | 75.1         | 3E-145  |
| SWMB_00731                              | korC, 2-oxoglutarate ferredoxin oxidoreductase subunit gamma        | 638138278 Swol_1398 2-oxoglutarate ferredoxin oxidoreductase gamma subunit                         | 93.4         | 1E-127                                                           | 646854799 Slip_1770 2-oxoglutarate ferredoxin oxidoreductase, gamma subunit (EC 1.2.2.3)           | 62.2         | 2E-82   |
|                                         |                                                                     |                                                                                                    |              |                                                                  | 646853257 Slip_0223 fumarate reductase/succinate dehydrogenase flavoprotein domain protein         |              |         |
| <b>re-citrate synthase gene cluster</b> |                                                                     |                                                                                                    |              |                                                                  |                                                                                                    |              |         |
| SWMB_01738                              | isocitrate dehydrogenase [NADP]                                     | 638137267 Swol_0378 isocitrate dehydrogenase (NADP) (EC 1.1.1.42)                                  | 97.9         | 0                                                                | 646853542 Slip_0511 isocitrate dehydrogenase (NADP) (EC 1.1.1.42)                                  | 81.3         | 0       |
| SWMB_01739                              | 2,3-dimethylmalate dehydratase small subunit                        | 638137266 Swol_0377 leuD 3-isopropylmalate dehydratase, small subunit (EC 4.2.1.3)                 | 98.8         | 6E-121                                                           | 646853541 Slip_0510 leuD 3-isopropylmalate dehydratase, small subunit                              | 80.1         | 2E-99   |
| SWMB_01740                              | 2,3-dimethylmalate dehydratase large subunit                        | 638137265 Swol_0376 leuC 3-isopropylmalate dehydratase, large subunit (EC 4.2.1.3)                 | 97.8         | 0                                                                | 646853540 Slip_0509 leuC homoacemate hydratase family protein                                      | 78.7         | 0       |
| SWMB_01741                              | putative re-citrate synthase                                        | 638137264 Swol_0375 hypothetical protein                                                           | 97.4         | 0                                                                | 646853539 Slip_0508 homocitrate synthase                                                           | 76.3         | 0       |
| <b>Pentose phosphate pathway</b>        |                                                                     |                                                                                                    |              |                                                                  |                                                                                                    |              |         |
| SWMB_00140                              | tdkA, tdkB, transketolase                                           | 638137140 Swol_0244 transketolase subunit B (EC 2.2.1.1)                                           | 96.5         | 0                                                                | 646854901 Slip_1873 transketolase subunit B (EC 2.2.1.1)                                           | 67.1         | 3E-157  |
| SWMB_00141                              | tdkA, tdkB, transketolase                                           | 638137139 Swol_0243 transketolase subunit A (EC 2.2.1.1)                                           | 95.6         | 0                                                                | 646854902 Slip_1874 transketolase subunit A (EC 2.2.1.1)                                           | 70.6         | 6E-138  |
| SWMB_00514                              | tdkA, tdkB, transaldolase                                           | 638139294 tdkA transaldolase (EC 2.2.1.2)                                                          | 96.1         | 2E-155                                                           | 646855334 tdkA transaldolase (EC 2.2.1.2)                                                          | 72.5         | 1E-116  |
| SWMB_02744                              | PRP, ppsA, ribose-phosphate 3-epimerase                             | 638138098 Swol_1233 ribose-5-phosphate 3-epimerase (EC 5.1.3.1)                                    | 98.8         | 0                                                                | 646853901 Slip_0765 ribose-5-phosphate 3-epimerase (EC 5.1.3.1)                                    | 58.7         | 2E-93   |
| SWMB_00294                              | PRP, ppsA, ribose-phosphate pyrophosphokinase                       | 638138097 Swol_1376 pyruvate ferredoxin oxidoreductase, delta subunit (EC 1.2.1.7)                 | 97.8         | 0                                                                | 646853149 Swol_0765 ribose-phosphate pyrophosphokinase                                             | 76.6         | 5E-170  |
| SWMB_01013                              | ppm-pgm, phosphomannomutase / phosphoglucomutase                    | 638139034 Swol_2154 phosphomannomutase (EC 5.4.2.8)                                                | 94.0         | 0                                                                | 646853797 Slip_0765 phosphomannomutase (EC 5.4.2.8)                                                | 69.4         | 0       |
| SWMB_02559                              | deobP, phosphopentomutase                                           | 638137487 deobP phosphopentomutase                                                                 | 93.3         | 0                                                                | 646853524 deobP phosphopentomutase                                                                 | 60.8         | 9E-171  |
| SWMB_01012                              | ppm-pgm, phosphomannomutase / phosphoglucomutase                    | 638139034 Swol_2154 phosphomannomutase (EC 5.4.2.8)                                                | 94.0         | 0                                                                | 646853797 Slip_0765 phosphomannomutase (EC 5.4.2.8)                                                | 69.4         | 0       |
| SWMB_02912                              | ppm-pgm, phosphomannomutase / phosphoglucomutase                    | 638139034 Swol_2154 phosphomannomutase (EC 5.4.2.8)                                                | 94.0         | 0                                                                | 646853797 Slip_0765 phosphomannomutase (EC 5.4.2.8)                                                | 69.4         | 0       |
| SWMB_00294                              | PRP, ppsA, ribose-phosphate pyrophosphokinase                       | 638138097 Swol_1376 pyruvate ferredoxin oxidoreductase, delta subunit (EC 1.2.1.7)                 | 97.8         | 0                                                                | 646853149 Swol_0765 ribose-phosphate pyrophosphokinase                                             | 76.6         | 5E-170  |
| SWMB_02011                              | deoC, DERA, deoxyribose-phosphate aldolase                          | 638138440 deoC Deoxyribose-phosphate aldolase                                                      | 93.2         | 2E-150                                                           | 646854663 deoC deoxyribose-phosphate aldolase                                                      | 48.6         | 9E-62   |
|                                         |                                                                     |                                                                                                    |              |                                                                  | 646855321 Slip_2294 sugar-phosphate isomerase, RpiB/LacA/LacB family                               |              |         |
|                                         |                                                                     |                                                                                                    |              |                                                                  | 646853351 Slip_0321 PflB domain protein                                                            |              |         |
| <b>Amplimeric reactions</b>             |                                                                     |                                                                                                    |              |                                                                  |                                                                                                    |              |         |
| SWMB_02089                              | pyk, pyruvate kinase                                                | 638138922 Swol_2040 pyruvate kinase (EC 2.7.1.40)                                                  | 97.9         | 0                                                                | 646854732 Slip_1701 pyruvate kinase (EC 2.7.1.40)                                                  | 61.7         | 0       |
| SWMB_02328                              | pyruvate, orthophosphate dikinase                                   | 638138392 Swol_1512 pyruvate phosphate dikinase (EC 2.7.9.1)                                       | 96.5         | 0                                                                | 646854654 Slip_1625 pyruvate phosphate dikinase (EC 2.7.9.1)                                       | 75.2         | 0       |
| SWMB_00006                              | porI, pyruvate ferredoxin oxidoreductase beta subunit               | 638138254 Swol_1374 pyruvate ferredoxin oxidoreductase, beta subunit                               | 96.5         | 0                                                                |                                                                                                    |              |         |
| SWMB_00007                              | porC, pyruvate ferredoxin oxidoreductase alpha subunit              | 638138255 Swol_1375 pyruvate ferredoxin oxidoreductase, alpha subunit (EC 1.2.1.7)                 | 94.0         | 0                                                                |                                                                                                    |              |         |
| SWMB_00008                              | porF, pyruvate ferredoxin oxidoreductase delta subunit              | 638138256 Swol_1376 pyruvate ferredoxin oxidoreductase, delta subunit (EC 1.2.1.7)                 | 94.1         | 2E-70                                                            |                                                                                                    |              |         |
| SWMB_00009                              | porG, pyruvate ferredoxin oxidoreductase gamma subunit              | 638138257 Swol_1377 pyruvate ferredoxin oxidoreductase, gamma subunit (EC 1.2.1.7)                 | 93.8         | 1E-137                                                           |                                                                                                    |              |         |
| SWMB_00921                              | porC, pyruvate ferredoxin oxidoreductase gamma subunit              | 638139117 Swol_2237 pyruvate ferredoxin oxidoreductase, gamma subunit (EC 1.2.1.7)                 | 95.7         | 1E-121                                                           |                                                                                                    |              |         |
| SWMB_00922                              | porF, pyruvate ferredoxin oxidoreductase delta subunit              | 638139116 Swol_2236 pyruvate ferredoxin oxidoreductase, delta subunit                              | 96.5         | 7E-58                                                            |                                                                                                    |              |         |
| SWMB_00923                              | porC, pyruvate ferredoxin oxidoreductase gamma subunit              | 638139115 Swol_2235 2-oxo-oxoal ferredoxin oxidoreductase, alpha subunit                           | 99.2         | 0                                                                |                                                                                                    |              |         |
| SWMB_00924                              | porF, pyruvate ferredoxin oxidoreductase beta subunit               | 638139114 Swol_2234 2-ketocacid ferredoxin oxidoreductase beta subunit                             | 99.0         | 0                                                                |                                                                                                    |              |         |
| SWMB_02955                              | aldelyde dehydrogenase (NAD <sup>+</sup> )                          | 63931138 Swol_0319 Aldelyde dehydrogenase                                                          | 88.5         | 0                                                                |                                                                                                    |              |         |
| SWMB_01418                              | Phosphoenolpyruvate synthase (2.7.9.2)                              |                                                                                                    |              |                                                                  |                                                                                                    |              |         |
| SWMB_01420                              | Phosphoenolpyruvate synthase (2.7.9.2)                              |                                                                                                    |              |                                                                  |                                                                                                    |              |         |
| SWMB_02538                              | Phosphoenolpyruvate synthase (2.7.9.2)                              |                                                                                                    |              |                                                                  |                                                                                                    |              |         |
| SWMB_02598                              | Phosphoenolpyruvate synthase (2.7.9.2)                              |                                                                                                    |              |                                                                  |                                                                                                    |              |         |
| <b>RNA polymerase</b>                   |                                                                     |                                                                                                    |              |                                                                  |                                                                                                    |              |         |
| SWMB_00505                              | DNA-directed RNA polymerase subunit delta                           | 638139048 Swol_2420 hypothetical protein                                                           | 90.9         | 6E-50                                                            | 646855343 Slip_2318 hypothetical protein                                                           | 43.6         | 1E-17   |
| SWMB_00509                              | DNA-directed RNA polymerase subunit beta                            | 638139222 pfkA DNA-directed RNA polymerase subunit beta (EC 2.7.7.6)                               | 98.3         | 0                                                                | 646855267 pfkA DNA-directed RNA polymerase subunit beta (EC 2.7.7.6)                               | 81.4         | 0       |
| SWMB_00590                              | DNA-directed RNA polymerase subunit beta'                           | 638139221 pfkB DNA-directed RNA polymerase subunit beta' (EC 2.7.7.6)                              | 98.9         | 0                                                                | 646855266 pfkB DNA-directed RNA polymerase subunit beta' (EC 2.7.7.6)                              | 79.5         | 0       |
| SWMB_00625                              | DNA-directed RNA polymerase subunit alpha                           | 638139185 rpoA DNA-directed RNA polymerase subunit alpha (EC 2.7.7.6)                              | 99.7         | 0                                                                | 646855230 rpoA DNA-directed RNA polymerase subunit alpha (EC 2.7.7.6)                              | 75.6         | 5E-177  |
| SWMB_02752                              | DNA-directed RNA polymerase subunit omega                           | 638138111 rpoZ DNA-directed RNA polymerase subunit omega (EC 2.7.7.6)                              | 95.8         | 6E-35                                                            | 646853888 rpoZ DNA-directed RNA polymerase subunit omega (EC 2.7.7.6)                              | 64.4         | 9E-22   |
| <b>Sigma factor / anti-sigma factor</b> |                                                                     |                                                                                                    |              |                                                                  |                                                                                                    |              |         |
| SWMB_00121                              | rpoN, RNA polymerase sigma-54 factor                                | 638137158 Swol_0265 RNA polymerase, sigma 54 subunit, RpoN/SigL                                    | 96.8         | 0                                                                | 646854882 Slip_1854 RNA polymerase, sigma 54 subunit, RpoN/SigL                                    | 53.7         | 0       |
| SWMB_00232                              | rpoC, RNA polymerase sigma-70 factor, ECF subfamily                 | 638137032 Swol_0132 RNA polymerase, sigma-24 subunit, RpoE                                         | 89.2         | 1E-129                                                           | 646854990 Slip_1965 RNA polymerase, sigma-24 subunit, RpoE                                         | 58.2         | 1E-41   |
| SWMB_00233                              | mycothiol system anti-sigma-R factor                                | 638137031 Swol_0131 putative transmembrane anti-sigma factor                                       | 91.3         | 0                                                                | 646854992 Slip_1967 putative transmembrane anti-sigma factor                                       | 33.2         | 1E-71   |
| SWMB_00495                              | Sigma-W factor                                                      | 638137032 Swol_0132 RNA polymerase, sigma-24 subunit, RpoE                                         | 96.5         | 0                                                                | 646854430 Slip_1410 RNA polymerase, sigma-24 subunit, ECF subfamily                                | 35.0         | 1E-22   |
| SWMB_00576                              | RNA polymerase sporulation-specific sigma factor                    | 638139237 Swol_2351 RNA polymerase, sigma 30 subunit, SigH                                         | 100.0        | 0                                                                | 646855281 Slip_2255 RNA polymerase, sigma 30 subunit, SigH                                         | 84.4         | 3E-130  |
| SWMB_00768                              | rpoC, RNA polymerase sigma-70 factor, ECF subfamily                 | 638137032 Swol_0132 RNA polymerase, sigma-24 subunit, RpoE                                         | 27.3         | 1E-48                                                            | 646854430 Slip_1410 RNA polymerase, sigma-24 subunit, ECF subfamily                                | 21.8         | 6E-07   |
| SWMB_01098                              | Putative anti-sigma factor antagonist BtrV                          | 638138944 Swol_2062 anti-sigma-F factor antagonist (stage II sporulation protein AA)               | 96.0         | 1E-64                                                            | 646853556 Slip_0525 anti-sigma regulatory factor, SpoIIAA                                          | 31.5         | 9E-09   |
| SWMB_01044                              | rpoC, RNA polymerase sigma-70 factor, ECF subfamily                 | 638138940 Swol_2058 RNA polymerase, sigma-24 subunit, RpoE                                         | 97.1         | 1E-121                                                           | 646854430 Slip_1410 RNA polymerase, sigma-24 subunit, ECF subfamily                                | 26.5         | 1E-08   |
| SWMB_01123                              | sigma-70 RNA polymerase sigma factor                                | 638137818 Swol_0944 RNA polymerase sigma factor                                                    | 91.8         | 1E-162                                                           | 646853625 Slip_0594 putative RNA polymerase, sigma 28 subunit, FliA/WhiG subfamily                 | 32.4         | 1E-19   |
| SWMB_01321                              | RNA polymerase sigma factor for flagellar operon FliA               | 638137746 Swol_0878 RNA polymerase sigma 28 subunit, RpoG/SigF                                     | 96.6         | 0                                                                | 646854014 Slip_0982 RNA polymerase, sigma 28 subunit, SigD/FliA/WhiG                               | 63.1         | 6E-107  |
| SWMB_01365                              | RNA polymerase sporulation-specific sigma factor                    | 638137706 Swol_0836 RNA polymerase, sigma subunit, RpoG/SigG                                       | 99.6         | 3E-167                                                           | 646853841 Slip_0808 RNA polymerase, sigma subunit, RpoG/SigG                                       | 80.2         | 6E-134  |
| SWMB_01367                              | RNA polymerase sigma-35 factor precursor                            | 638137705 Swol_0835 RNA polymerase, sigma 29 subunit, SigE                                         | 98.3         | 7E-173                                                           | 646853840 Slip_0807 RNA polymerase, sigma 29 subunit, SigE                                         | 79.3         | 3E-124  |
| SWMB_01423                              | rpoC, RNA polymerase sigma-70 factor, ECF subfamily                 | 638138901 Swol_2019 RNA polymerase, sigma-24 subunit, RpoE                                         | 99.5         | 9E-142                                                           | 646854990 Slip_1965 RNA polymerase, sigma-24 subunit, RpoE                                         | 45.0         | 3E-47   |
| SWMB_01424                              | mycothiol system anti-sigma-R factor                                | 638138900 Swol_2018 putative transmembrane anti-sigma factor                                       | 91.2         | 0                                                                | 646854431 Slip_1411 hypothetical protein                                                           | 27.2         | 0.0001  |
| SWMB_01571                              | Putative anti-sigma factor antagonist BtrV                          | 638138678 Swol_1795 anti-sigma regulatory factor, SpoIIAA                                          | 90.0         | 3E-65                                                            | 646853556 Slip_0525 anti-sigma regulatory factor, SpoIIAA                                          | 22.3         | 0.0008  |
| SWMB_01574                              | rpoC, RNA polymerase sigma-70 factor, ECF subfamily                 | 638138674 Swol_1791 RNA polymerase, sigma-24 subunit, RpoE                                         | 91.3         | 1E-127                                                           | 646854430 Slip_1410 RNA polymerase, sigma-24 subunit, ECF subfamily                                | 27.2         | 1E-09   |
| SWMB_01607                              | Anti-sigma-V factor RsvF                                            | 638138645 Swol_1762 hypothetical protein                                                           | 92.5         | 3E-173                                                           | 646853840 Slip_0807 RNA polymerase, sigma 29 subunit, SigE                                         | 44.7         | 1E-13   |
| SWMB_01650                              | RNA polymerase sigma-28 factor precursor                            | 638137385 Swol_0501 sigma 28 (flagella/sporulation)                                                | 95.2         | 1E-86                                                            | 646854323 Slip_0393 RNA polymerase, sigma 27/28 subunit, RpsK/SigK                                 | 67.8         | 1E-53   |
| SWMB_01951                              | Anti-sigma-W factor RsvF                                            | 63931177 Swol_1624 hypothetical protein                                                            | 94.9         | 7E-155                                                           | 646855347 Slip_2322 S-layer domain protein                                                         | 25.0         | 0.00008 |
| SWMB_02043                              | Putative anti-sigma factor antagonist BtrV                          | 63813867                                                                                           |              |                                                                  |                                                                                                    |              |         |

|             |                                                                            |                                                                                                  |       |         |                                                                                                     |      |          |
|-------------|----------------------------------------------------------------------------|--------------------------------------------------------------------------------------------------|-------|---------|-----------------------------------------------------------------------------------------------------|------|----------|
| SWMB_00182  | flgD flagellar hook-associated protein 2                                   | 638137094 Swol_0197 Flagellar capping protein-like protein                                       | 36.8  | 4E-25   | 646854931 Slip_1904 flagellar hook-associated 2 domain protein                                      | 42.6 | 4E-28    |
| SWMB_00184  | Flagellar assembly factor Flw3                                             | 638137092 flw3 hypothetical protein                                                              | 54.5  | 2E-50   | 646854933 flw3 protein of unknown function DUF188                                                   | 47.7 | 1E-43    |
| SWMB_00186  | Flagellin                                                                  | 638137090 Swol_0193 Flagellin and related hook-associated protein-like protein                   | 35.9  | 3E-13   | 646854936 Slip_1909 flagellar hook-associated protein 3                                             | 48.0 | 6E-51    |
| SWMB_00187  | flgK flagellar hook-associated protein 1 FlgK                              | 638137089 Swol_0192 Flagellar hook-associated protein-like protein                               | 83.0  | 0       | 646854937 Slip_1910 flagellar hook-associated protein FlgK                                          | 43.6 | 1E-50    |
| SWMB_00189  | Flagellar biosynthesis anti-sigma factor FlgM                              | 638137087 Swol_0190 anti-sigma-28 factor, FlgM family                                            | 95.9  | 3E-54   | 646854939 Slip_1912 anti-sigma-28 factor, FlgM family                                               | 46.5 | 5E-19    |
| SWMB_00190  | Flagellar operon protein                                                   | 638137086 Swol_0189 flagellar protein                                                            | 98.6  | 1E-99   | 646854940 Slip_1913 flagellar protein                                                               | 50.4 | 1E-42    |
| SWMB_00551  | flgG flagellar basal-body rod protein FlgG                                 | 638137257 Swol_2373 flagellar basal-body rod protein (flgG-2)                                    | 94.7  | 4E-171  | 646854931 Slip_2273 flagellar basal-body rod protein FlgG                                           | 52.9 | 2E-82    |
| SWMB_00656  | Flagellar biosynthetic protein FlhB                                        | 638138554 Swol_1476 flagellar biosynthesis                                                       | 98.9  | 8E-57   | 646853949 Slip_0916 type III secretion exporter                                                     | 68.6 | 9E-36    |
| SWMB_01125  | Flagellar rod assembly protein/muramidine FlgJ                             | 638137820 Swol_0946 hypothetical protein                                                         | 92.4  | 3E-79   | 646853757 Slip_0725 flagellar protein FlgJ                                                          | 49.3 | 1E-23    |
| SWMB_01126  | flgK flagellar basal-body rod protein FlgK                                 | 638137821 Swol_0947 flagellar basal-body rod protein FlgK                                        | 95.8  | 0       | 646853758 Slip_0726 flagellar basal-body rod protein FlgK                                           | 63.2 | 1E-122   |
| SWMB_01321  | flhA RNA polymerase sigma factor for flagellar operon FlhA                 | 638137746 Swol_0878 RNA polymerase, sigma 28 subunit, SigD/FlhA/WhiG                             | 97.3  | 0       | 646854014 Slip_0982 RNA polymerase, sigma 28 subunit, SigD/FlhA/WhiG                                | 63.1 | 6E-107   |
| SWMB_01328  | Flagellin site-determining protein YlhJ                                    | 638137399 Swol_0871 flagellin                                                                    | 96.8  | 0       | 646854007 Slip_0973 CysH-type ac-diamide synthase                                                   | 57.8 | 2E-25    |
| SWMB_01329  | Flagella-associated GTP-binding protein                                    | 638137738 Swol_0870 hypothetical protein                                                         | 93.8  | 0       | 646854006 Slip_0974 flagellar biosynthetic protein FlhF                                             | 43.1 | 4E-113   |
| SWMB_01330  | Flagellar biosynthesis protein FlhA                                        | 638137737 Swol_0869 flagella-associated protein                                                  | 96.0  | 0       | 646854005 Slip_0973 flagellar biosynthesis protein FlhA                                             | 70.0 | 0        |
| SWMB_01331  | Flagellar biosynthetic protein FlhB                                        | 638137736 Swol_0868 flagellar biosynthesis/type III secretory pathway protein                    | 96.8  | 0       | 646854004 Slip_0972 flagellar biosynthetic protein FlhB                                             | 58.7 | 2E-155   |
| SWMB_01332  | Flagellar biosynthetic protein FlhR                                        | 638137735 Swol_0867 flagellar biosynthetic protein FlhR                                          | 96.1  | 8E-172  | 646854003 Slip_0971 flagellar biosynthetic protein FlhR                                             | 50.6 | 2E-89    |
| SWMB_01333  | Flagellar biosynthetic protein FlhQ                                        | 638137734 Swol_0866 hypothetical protein                                                         | 97.2  | 3E-55   | 646854002 Slip_0970 flagellar biosynthetic protein FlhQ                                             | 57.8 | 2E-25    |
| SWMB_01334  | Flagellar biosynthetic protein FlhP precursor                              | 638137733 Swol_0865 flagellar biosynthetic protein                                               | 97.1  | 4E-166  | 646854001 Slip_0969 flagellar biosynthetic protein FlhP                                             | 69.8 | 4E-118   |
| SWMB_01335  | Flagella biosynthesis protein FlhZ                                         | 638137732 Swol_0864 hypothetical protein                                                         | 91.9  | 1E-138  | 646854000 Slip_0968 hypothetical protein                                                            | 37.4 | 7E-32    |
| SWMB_01337  | Flagellar motor switch protein FlhN                                        | 638137730 Swol_0862 CheC, inhibitor of MCP methylation                                           | 91.5  | 0       | 646853998 Slip_0966 CheC, inhibitor of MCP methylation                                              | 57.3 | 2E-151   |
| SWMB_01338  | Flagellar motor switch protein FlhM                                        | 638137729 Swol_0861 hypothetical protein                                                         | 99.1  | 0       | 646853997 Slip_0965 flagellar motor switch protein FlhM                                             | 62.5 | 9E-161   |
| SWMB_01339  | Flagellar basal-body-associated protein FlhI                               | 638137728 Swol_0860 flagellar protein (FlhI)-like protein                                        | 96.9  | 2E-109  | 646853996 Slip_0964 flagellar basal-body-associated protein FlhI                                    | 51.9 | 4E-51    |
| SWMB_01340  | Flagellar protein (FlhD)                                                   | 638137727 Swol_0859 hypothetical protein                                                         | 95.3  | 1E-38   | 646853995 Slip_0963 flagellar FlhD family protein                                                   | 61.9 | 6E-24    |
| SWMB_01341  | Flagellar hook protein FlgE                                                | 638137726 Swol_0858 flagellar hook protein                                                       | 59.4  | 8E-130  | 646853994 Slip_0962 flagellar hook-basal body protein                                               | 40.1 | 9E-49    |
| SWMB_01342  | Flagellar operon protein                                                   | 638137725 Swol_0857 hypothetical protein                                                         | 93.8  | 4E-61   | 646853993 Slip_0961 flagellar operon protein                                                        | 54.3 | 9E-39    |
| SWMB_01343  | Flagellar basal body rod modification protein                              | 638137724 Swol_0856 flagellar hook capping protein-like protein                                  | 83.3  | 9E-106  | 646853992 Slip_0960 flagellar hook capping protein                                                  | 43.0 | 3E-34    |
| SWMB_01344  | Flagellar hook-length control protein FlhK                                 | 638137723 Swol_0855 flagellar hook-length control protein-like protein                           | 57.2  | 3E-94   | 646853991 Slip_0959 flagellar hook-length control protein                                           | 40.3 | 2E-21    |
| SWMB_01346  | Flagellar export protein FlhJ                                              | 638137721 Swol_0853 hypothetical protein                                                         | 96.0  | 3E-82   | 646853989 Slip_0957 flagellar export protein FlhJ                                                   | 35.4 | 7E-18    |
| SWMB_01347  | flhI flagellin-specific ATP synthase                                       | 638137720 Swol_0852 type III secretion system ATPase, FlhI-YscN (EC 3.6.1.5)                     | 96.6  | 0       | 646853988 Slip_0956 type III secretion system ATPase, FlhI-YscN (EC 3.6.1.5)                        | 70.7 | 0        |
| SWMB_01348  | flhI flagellar assembly protein FlhI                                       | 638137719 Swol_0851 flagellar biosynthesis/type III secretory pathway protein-like protein       | 92.1  | 0       | 646853987 Slip_0955 flagellar assembly protein FlhI>Type III secretion system HrpE                  | 40.0 | 1E-38    |
| SWMB_01349  | Flagellar motor switch protein Flg                                         | 638137718 Swol_0850                                                                              | 92.1  | 0       | 646853986 Slip_0954 flagellar motor switch protein Flg                                              | 75.1 | 8E-173   |
| SWMB_01350  | Flagellar M-ring protein                                                   | 638137717 Swol_0849 flagellar M-ring protein FlhF                                                | 93.9  | 0       | 646853985 Slip_0953 flagellar M-ring protein FlhF                                                   | 45.3 | 1E-17    |
| SWMB_01351  | Flagellar hook-basal body complex protein FlhE                             | 638137716 flhE flagellar hook-basal body protein                                                 | 85.3  | 9E-58   | 646853984 flhE flagellar hook-basal body complex protein FlhE                                       | 52.4 | 7E-29    |
| SWMB_01353  | Flagellar basal body rod protein FlgB                                      | 638137715 Swol_0846 hypothetical protein                                                         | 91.3  | 8E-88   | 646853982 Slip_0950 flagellar basal-body rod protein FlgB                                           | 48.2 | 1E-38    |
| SWMB_01934  | Flagellum site-determining protein YlhJ                                    | 638138085 Swol_1211 nucleotide-binding protein                                                   | 47.5  | 5E-82   | 646853371 Slip_0341 ATPase-like, ParA/Mnd                                                           | 52.0 | 1E-89    |
| SWMB_02893  | Flagellar motor switch protein                                             | 638137721 Swol_0853 CheC, inhibitor of MCP methylation                                           | 95.8  | 5E-139  | 646854012 Slip_0980 CheC, inhibitor of MCP methylation                                              | 25.3 | 2E-45    |
| SWMB_02606  | Flagellar assembly protein P                                               | 638137151 Swol_0257 hypothetical protein                                                         | 82.1  | 0       | 646853757 Slip_0725 flagellar protein FlgJ                                                          |      |          |
|             |                                                                            |                                                                                                  |       |         | 646853758 Slip_0726 flagellar basal-body rod protein FlgG                                           |      |          |
|             |                                                                            |                                                                                                  |       |         | 646853983 Slip_0951 flagellar basal-body rod protein FlgC                                           |      |          |
|             |                                                                            |                                                                                                  |       |         | 646853984 Slip_0952 flhE flagellar hook-basal body complex subunit FlhE                             |      |          |
|             |                                                                            |                                                                                                  |       |         | 646854932 Slip_1908 flagellin domain protein                                                        |      |          |
|             |                                                                            |                                                                                                  |       |         | 646854932 Slip_1905 carbon source regulator, CsrA (could also regulate swarming and quorum sensing) |      |          |
| Pilin       |                                                                            |                                                                                                  |       |         |                                                                                                     |      |          |
| SWMB_02048  | cpaF, pilA, pilN assembly protein CpaF                                     | 638137415 Swol_0531 type II secretion system protein E                                           | 34.9  | 5E-10   | 646854946 Slip_1919 type II secretion system protein E                                              | 31.0 | 5E-40    |
| SWMB_02057  | Tip pilus assembly protein CpaA                                            | 638139006 Swol_2126 butyryl-CoA dehydrogenase (EC 1.3.99.2)                                      | 27.7  | 0.009   | 646854215 Slip_1187 Peptidyl pyridase                                                               | 29.6 | 0.0010   |
| SWMB_02441  | Fimbrial assembly protein (PilN)                                           | 638137424 Swol_0540 hypothetical protein                                                         | 94.6  | 4E-98   | 646854206 Slip_1178 Fimbrial assembly family protein                                                | 25.7 | 2E-00002 |
| SWMB_02442  | type IV pilus assembly protein PilM                                        | 638137423 Swol_0539 Tip pilus assembly protein ATPase PilM-like protein                          | 89.4  | 0       | 646853433 Slip_0403 Tip pilus assembly protein ATPase PilM                                          | 16.3 | 0.00002  |
| SWMB_02443  | pilP, pilQ, peptidase (prepilin peptidase) / N-methyltransferase           | 638137422 Swol_0538 type 4 prepilin peptidase 1 (EC3.4.23.43) Aspartic peptidase MEROPS family 3 | 93.4  | 5E-135  | 646854215 Slip_1187 Prepilin peptidase                                                              | 38.6 | 4E-47    |
| SWMB_02447  | major pilin subunit                                                        | 638137416 Swol_0534 hypothetical protein                                                         | 100.0 | 3E-99   | 646853418 Slip_1186 hypothetical protein                                                            | 40.0 | 2E-09    |
| SWMB_02448  | type IV pilus assembly protein PilC                                        | 638137417 Swol_0533 type II secretion system protein                                             | 99.8  | 0       | 646853295 Slip_1014 type IV secretion system F domain protein                                       | 41.3 | 1E-97    |
| SWMB_02449  | twitching motility protein PilT                                            | 638137416 Swol_0532 twitching motility protein                                                   | 99.3  | 0       | 646854216 Slip_1188 twitching motility protein                                                      | 48.6 | 1E-115   |
| SWMB_02450  | type IV pilus assembly protein PilB                                        | 638137415 Swol_0531 type II secretion system protein E                                           | 92.1  | 0       | 646853431 Slip_0401 type II secretion system protein E (CspE)                                       | 51.7 | 2E-146   |
| SWMB_00028  | putative protein encoded in hypervariable junctions of pilus gene clusters | 638137455 Swol_0572 hypothetical protein                                                         | 42.7  | 5E-24   |                                                                                                     |      |          |
| SWMB_01569  | putative protein encoded in hypervariable junctions of pilus gene clusters | 638137455 Swol_0572 hypothetical protein                                                         | 30.2  | 0.00007 |                                                                                                     |      |          |
| SWMB_01647  | putative protein encoded in hypervariable junctions of pilus gene clusters | 638137455 Swol_0572 hypothetical protein                                                         | 39.3  | 0       |                                                                                                     |      |          |
| SWMB_02440  | type IV pilus assembly protein PilO                                        | 638137425 Swol_0541 hypothetical protein                                                         | 84.2  | 4E-159  |                                                                                                     |      |          |
| SWMB_02444  | Tip pilus assembly protein PilX                                            | 638137421 Swol_0537 hypothetical protein                                                         | 91.2  | 4E-89   |                                                                                                     |      |          |
| SWMB_02445  | Type II secretory pathway, component PilQ                                  | 638137420 Swol_0536 hypothetical protein                                                         | 97.4  | 6E-110  |                                                                                                     |      |          |
| SWMB_02446  | putative type IV pilin N-term methylation site GFxxxE                      | 638137419 Swol_0535 hypothetical protein                                                         | 99.3  | 2E-101  |                                                                                                     |      |          |
| SWMB_03047  | putative protein encoded in hypervariable junctions of pilus gene clusters | 638137455 Swol_0572 hypothetical protein                                                         | 23.7  | 0.0004  |                                                                                                     |      |          |
| SWMB_02458  | Vernu, Chiton cassette protein D                                           |                                                                                                  |       |         | 646853426 Slip_0396 pilin assembly protein                                                          | 37.0 | 2E-23    |
|             |                                                                            |                                                                                                  |       |         | 646854951 Slip_1924 peptidase A2/A4 prepilin type IV                                                |      |          |
|             |                                                                            |                                                                                                  |       |         | 646854952 Slip_1925 PilP/Fap pilin component                                                        |      |          |
|             |                                                                            |                                                                                                  |       |         | 646854008 Slip_0976 type IV pilus assembly PilZ                                                     |      |          |
|             |                                                                            |                                                                                                  |       |         | 646854046 Slip_1014 type IV secretion system PilZ                                                   |      |          |
|             |                                                                            |                                                                                                  |       |         | 646853435 Slip_0405 Pilus assembly protein, PilO                                                    |      |          |
|             |                                                                            |                                                                                                  |       |         | 646853434 Slip_0404 Fimbrial assembly family protein                                                |      |          |
|             |                                                                            |                                                                                                  |       |         | 646853432 Slip_0402 Type 4 fimbrial biogenesis protein PilX, N-terminal domain                      |      |          |
|             |                                                                            |                                                                                                  |       |         | 646854218 Slip_1190 PilT protein domain protein                                                     |      |          |
| Sporulation |                                                                            |                                                                                                  |       |         |                                                                                                     |      |          |
| SWMB_00101  | Sporulation-specific N-acetylmuramoyl-L-alanine amidase                    | 638137026 Swol_0126 N-acetylmuramoyl-L-alanine amidase                                           | 36.6  | 3E-20   | 646853299 Slip_0268 cell wall hydrolase/autolysin                                                   | 35.0 | 1E-20    |
| SWMB_00122  | Sporulation transcription regulator WhiA                                   | 638137157 whiA hypothetical protein                                                              | 95.9  | 0       | 646854883 whiA protein of unknown function DUF1979                                                  | 50.0 | 5E-100   |
| SWMB_00269  | Stage II sporulation protein E                                             | 638136995 Swol_0093 Phosphoprotein phosphatase                                                   | 94.8  | 0       | 646853450 Slip_1189 phosphoprotein phosphatase                                                      | 42.6 | 0        |
| SWMB_00274  | spore coat biosynthesis protein YabQ                                       | 638136988 Swol_0086 hypothetical protein                                                         | 97.4  | 4E-83   | 646853519 Slip_0115 Spore coat biosynthesis protein, YabQ                                           | 49.8 | 1E-42    |
| SWMB_00275  | Spore protein YabP                                                         | 638136987 Swol_0085 hypothetical protein                                                         | 100.0 | 4E-59   | 646853158 Slip_0114 sporulation protein YabP                                                        | 44.4 | 1E-23    |
| SWMB_00281  | Stage II sporulation protein F                                             | 638136983 Swol_0081 stage V sporulation protein B                                                | 97.7  | 0       | 646853154 Slip_0110 polysaccharide biosynthesis protein                                             | 66.7 | 0        |
| SWMB_00282  | Stage V sporulation protein T                                              | 638136982 Swol_0080 transcriptional regulator, AbrB family                                       | 98.9  | 2E-130  | 646853153 Slip_0109 transcriptional regulator, AbrB family                                          | 73.9 | 8E-92    |
| SWMB_00283  | Spore germination protein YadE                                             | 638136981 Swol_0079 hypothetical protein                                                         | 93.6  | 0       | 646853328 Slip_0297 spore germination protein                                                       | 28.4 | 7E-23    |
| SWMB_00284  | Spore germination protein B1                                               | 638136980 Swol_0078 germination protein                                                          | 99.4  | 4E-85   | 646853329 Slip_0296 CpaA spore germination protein                                                  | 49.9 | 9E-99    |
| SWMB_00285  | Spore germination protein B3 precursor                                     | 638136979 Swol_0077 hypothetical protein                                                         | 91.9  | 0       | 646853327 Slip_0296 germination protein, GerX/C family                                              | 36.4 | 1E-86    |
| SWMB_00286  | Spore germination protein B3 precursor                                     | 638136977 Swol_0075 hypothetical protein                                                         | 88.7  | 0       | 646853327 Slip_0296 germination protein, GerX/C family                                              | 33.8 | 1E-67    |
| SWMB_00289  | Spore germination protein (amino acid permease)                            | 638136976 Swol_0074 hypothetical protein                                                         | 88.0  | 0       | 646854095 Slip_1063 spore germination protein                                                       | 23.6 | 1E-14    |
| SWMB_00298  | stage II sporulation protein R                                             | 638136966 Swol_0073 pro-sigma-E processing factor spoRR                                          | 96.8  | 1E-134  | 646853414 Slip_1010 stage II sporulation protein R                                                  | 58.3 | 2E-56    |
| SWMB_00313  | sporulation initiation protein YhcY/Yhl family                             | 638136955 Swol_0052 hypothetical protein                                                         | 91.1  | 2E-111  | 646853318 Slip_0057 sporulation initiation protein, YhcY/Yhl                                        | 39.8 | 5E-14    |
| SWMB_00376  | Stage II sporulation protein J                                             | 638136954 Swol_0051 hypothetical protein                                                         | 98.1  | 6E-156  | 646854507 Slip_2382 protein translocase subunit yJcE                                                | 54.2 | 9E-95    |
| SWMB_00382  | Sporulation initiation inhibitor protein YscA                              | 638139452 Swol_2568 chromosome segregation ATPase                                                | 97.3  | 0       | 646855401 Slip_2376 chromosome segregation ATPase                                                   | 65.6 | 1E-124   |
| SWMB_00387  | putative sporulation protein YycC                                          | 638139447 Swol_2563 YycC                                                                         | 93.1  | 5E-142  | 646855394 Slip_2369 sporulation protein YycC                                                        | 55.7 | 3E-66    |
| SWMB_00404  | Sporulation kinase E                                                       | 638139431 Swol_2546 Signal transduction histidine kinase-like protein                            | 20.3  | 0.0007  | 646854510 Slip_1119 putative PAS/PAC sensor protein                                                 | 23.4 | 0.00065  |
| SWMB_00512  | Sporulation initiation phosphotransferase F                                | 638139296 Swol_2042 response regulator receiver protein                                          | 99.3  | 0       | 646853329 Slip_0296 CpaA spore germination protein                                                  | 49.9 | 9E-99    |
| SWMB_00576  | Stage 0 sporulation protein H                                              | 638139237 Swol_2351 RNA polymerase, sigma 30 subunit, SigH                                       | 100.0 | 1E-159  | 646855281 Slip_2254 RNA polymerase, sigma 30 subunit, SigH                                          | 84.4 | 8E-130   |
| SWMB_00669  | Sporulation initiation inhibitor protein soj                               | 638138334 Swol_1454 chromosome partitioning protein                                              | 93.5  | 0       | 646854760 Slip_1729 Cofribin acid ac-diamide synthase                                               | 68.1 | 5E-131   |
| SWMB_00717  | putative spore protein YtlJ                                                | 638138294 Swol_1414 hypothetical protein                                                         | 100.0 | 3E-98   | 646853383 Slip_0552 sporulation protein YtlJ                                                        | 66.1 | 1E-55    |
| SWMB_00719  | Spore maturation protein A                                                 | 638138293 Swol_1413 nucleoside recognition protein                                               | 97.5  | 2E-137  | 646853384 Slip_0553 nucleoside recognition domain protein                                           | 71.4 | 3E-63    |
| SWMB_00815  | stage II sporulation protein P                                             | 638138292 Swol_1412 nucleoside recognition protein                                               | 98.3  | 4E-124  | 646853385 Slip_0554 nucleoside recognition domain protein                                           | 74.2 | 5E-69    |
| SWMB_00833  | Stage IV sporulation protein A                                             | 638138203 Swol_1322 hypothetical protein                                                         | 97.7  | 0       | 646854498 Slip_1476 stage II sporulation protein P                                                  | 47.6 | 3E-106   |
| SWMB_00886  | Stage III sporulation protein E                                            | 638138140 Swol_1265 DNA translocase FtsK                                                         | 95.7  | 0       | 646854070 Slip_1038 DNA translocase FtsK                                                            | 53.4 | 0        |
| SWMB_01127  | sporulation protein, YlmC/YlmH family                                      | 638137822 Swol_0948 hypothetical protein                                                         | 97.9  | 3E-63   | 646853384 Slip_0553 nucleoside recognition domain protein                                           | 64.5 | 4E-32    |
| SWMB_01186  | Stage V sporulation protein B2                                             | 638137856 Swol_0903 SpoVx                                                                        | 99.3  | 0       | 646853411 Slip_1080 A.A.A. ATPase germination domain protein                                        | 63.5 | 4E-122   |
| SWMB_01255  | Spore germination protein                                                  | 638137923 Swol_1052 SpoE germination protein-like protein                                        | 99.1  | 0       | 646853068 Slip_0022 Spore germination protein-like Gmad2                                            | 58.6 | 1E-106   |
| SWMB_01258  | Sporulation kinase E                                                       | 638137925 Swol_1054 PAS/PAC sensor signal transduction histidine kinase (EC 2.7.1.33)            | 89.2  | 0       | 646853849 Slip_0816 PAS/PAC sensor signal transduction histidine kinase (EC 2.7.1.33)               | 24.9 | 4E-21    |
| SWMB_01267  | Sporulation protein YumB                                                   | 638137797 Swol_0931 hypothetical protein                                                         | 98.2  | 4E-155  | 646853750 Slip_0723 sporulation protein YumB                                                        | 51.7 | 4E-66    |
| SWMB_01281  | Small, acid-soluble spore proteins, alpha beta type                        | 638137798 Swol_0918 hypothetical protein                                                         | 98.3  | 5E-36   | 646854098 Slip                                                                                      |      |          |









Table S4. *Syntrophomonas wolfei* subsp. *methylbutyratica* strain 4J5<sup>T</sup> genes encoding  $\beta$ -oxidation pathway.

| Locus tag                                                 | Gene product                                                            | Best BLAST hit in:                      |       |           |                                               |      |           |
|-----------------------------------------------------------|-------------------------------------------------------------------------|-----------------------------------------|-------|-----------|-----------------------------------------------|------|-----------|
|                                                           |                                                                         | <i>Syntrophomonas wolfei</i> Goettingen |       |           | <i>Syntrophothermus lipocalidus</i> DSM 12680 |      |           |
|                                                           |                                                                         | Locus tag                               | %ID   | e-value   | Locus tag                                     | %ID  | e-value   |
| <b>Acyl-CoA dehydrogenase</b>                             |                                                                         |                                         |       |           |                                               |      |           |
| SWMB_00118                                                | Acyl-CoA dehydrogenase                                                  | Swol_0268                               | 99.2  | 0         | Slip_0874                                     | 82.6 | 0         |
| SWMB_00649                                                | Acyl-CoA dehydrogenase                                                  | Swol_1483                               | 98.7  | 0         | Slip_0286                                     | 83.5 | 0         |
| SWMB_01042                                                | Acyl-CoA dehydrogenase                                                  | Swol_2126                               | 98.7  | 0         | Slip_0456                                     | 63.1 | 0         |
| SWMB_01416                                                | Acyl-CoA dehydrogenase                                                  | Swol_0788                               | 99.7  | 0         | Slip_0501                                     | 70.2 | 0         |
| SWMB_01499                                                | Acyl-CoA dehydrogenase, short-chain specific                            | Swol_1933                               | 99.2  | 0         | Slip_0881                                     | 72.0 | 0         |
| SWMB_01701                                                | Acyl-CoA dehydrogenase                                                  | Swol_0788                               | 66.5  | 0         | Slip_0501                                     | 73.9 | 0         |
| SWMB_01732                                                | Acyl-CoA dehydrogenase, short-chain specific                            | Swol_0384                               | 97.7  | 0         | Slip_0481                                     | 56.4 | 0         |
| SWMB_01942                                                | Acyl-CoA dehydrogenase                                                  | Swol_0788                               | 44.3  | 1E-105    | Slip_1241                                     | 75.3 | 0         |
| SWMB_02100                                                | Acyl-CoA dehydrogenase                                                  | Swol_2052                               | 94.9  | 0         | Slip_0881                                     | 71.6 | 0         |
| SWMB_02510                                                | Acyl-CoA dehydrogenase                                                  | Swol_0384                               | 72.2  | 0         | Slip_0481                                     | 54.9 | 0         |
| <b>Enoyl-CoA hydratase</b>                                |                                                                         |                                         |       |           |                                               |      |           |
| SWMB_00384                                                | putative enoyl-CoA hydratase echA8                                      | Swol_2566                               | 87.4  | 3.00E-161 |                                               |      |           |
| SWMB_00648                                                | 2-methyl-but-2-enoyl-CoA hydratase                                      | Swol_1484                               | 97.3  | 0         | Slip_2197                                     | 63.5 | 1.00E-120 |
| SWMB_01414                                                | putative enoyl-CoA hydratase echA8                                      | Swol_0790                               | 96.5  | 0         | Slip_2197                                     | 63.1 | 1E-113    |
| SWMB_01496                                                | putative enoyl-CoA hydratase echA8                                      | Swol_1936                               | 98.9  | 0         | Slip_2197                                     | 66.5 | 3E-122    |
| SWMB_01703                                                | 2-methyl-but-2-enoyl-CoA hydratase                                      | Swol_0790                               | 42.3  | 1E-59     | Slip_0502                                     | 65.6 | 1E-115    |
| SWMB_02083                                                | putative enoyl-CoA hydratase echA8                                      | Swol_2031                               | 97.7  | 0         | Slip_2197                                     | 64.6 | 1E-115    |
| SWMB_02134                                                | putative enoyl-CoA hydratase echA8                                      | Swol_0650                               | 98.4  | 0         |                                               |      |           |
| SWMB_02508                                                | 2-methyl-but-2-enoyl-CoA hydratase                                      | Swol_2031                               | 67.3  | 9.00E-129 | Slip_2197                                     | 56.9 | 8.00E-100 |
| SWMB_03023                                                | putative enoyl-CoA hydratase echA8                                      | Swol_2031                               | 45.8  | 9E-76     | Slip_0502                                     | 68.0 | 2E-125    |
| <b>3-hydroxybutyryl-CoA dehydrogenase</b>                 |                                                                         |                                         |       |           |                                               |      |           |
| SWMB_00002                                                | putative 3-hydroxybutyryl-CoA dehydrogenase                             | Swol_0307                               | 99.3  | 0         | Slip_0503                                     | 54.6 | 9E-107    |
| SWMB_00647                                                | 2-methyl-3-hydroxybutyryl-CoA dehydrogenase                             | Swol_1485                               | 97.5  | 0         | Slip_0285                                     | 82.9 | 6E-168    |
| SWMB_01413                                                | putative 3-hydroxybutyryl-CoA dehydrogenase                             | Swol_0791                               | 98.6  | 0         | Slip_1415                                     | 56.8 | 2E-112    |
| SWMB_01497                                                | putative 3-hydroxybutyryl-CoA dehydrogenase                             | Swol_1935                               | 99.3  | 0         | Slip_1415                                     | 82.4 | 5E-172    |
| SWMB_01704                                                | 2-methyl-3-hydroxybutyryl-CoA dehydrogenase                             | Swol_0435                               | 93.0  | 7.00E-129 | Slip_0503                                     | 71.3 | 7E-123    |
| SWMB_01947                                                | putative 3-hydroxybutyryl-CoA dehydrogenase                             | Swol_0435                               | 61.8  | 1.00E-84  | Slip_1238                                     | 73.2 | 2E-145    |
| SWMB_02082                                                | putative 3-hydroxybutyryl-CoA dehydrogenase                             | Swol_2030                               | 99.3  | 0         | Slip_0503                                     | 55.6 | 5E-109    |
| SWMB_02507                                                | 2-methyl-3-hydroxybutyryl-CoA dehydrogenase                             | Swol_0791                               | 68.8  | 9E-139    | Slip_0503                                     | 54.6 | 5E-103    |
| SWMB_02718                                                | putative 3-hydroxybutyryl-CoA dehydrogenase                             | Swol_1171                               | 96.8  | 0         | Slip_1415                                     | 53.4 | 5E-107    |
| <b>Acetyl-CoA acetyltransferase</b>                       |                                                                         |                                         |       |           |                                               |      |           |
| SWMB_00001                                                | Acetyl-CoA acetyltransferase                                            | Swol_0308                               | 97.5  | 0         | Slip_0499                                     | 59.9 | 9E-172    |
| SWMB_00646                                                | 2-methyl-acetoacetyl-CoA acetyltransferase                              | Swol_1486                               | 97.8  | 0         | Slip_0284                                     | 62.8 | 1E-163    |
| SWMB_01415                                                | Acetyl-CoA acetyltransferase                                            | Swol_0789                               | 98.0  | 0         | Slip_0499                                     | 66.8 | 0         |
| SWMB_01498                                                | Acetyl-CoA acetyltransferase                                            | Swol_1934                               | 98.0  | 0         | Slip_0880                                     | 79.8 | 0         |
| SWMB_01702                                                | 2-methyl-acetoacetyl-CoA acetyltransferase                              | Swol_0789                               | 74.5  | 0         | Slip_0499                                     | 66.5 | 0         |
| SWMB_01946                                                | Acetyl-CoA acetyltransferase                                            | Swol_0789                               | 72.7  | 0         | Slip_0499                                     | 68.4 | 0         |
| SWMB_02099                                                | Acetyl-CoA acetyltransferase                                            | Swol_2051                               | 95.7  | 0         | Slip_0880                                     | 81.1 | 0         |
| SWMB_02161                                                | Acetyl-CoA acetyltransferase                                            | Swol_0675                               | 99.5  | 0         | Slip_0499                                     | 67.3 | 0         |
| SWMB_02509                                                | 2-methyl-acetoacetyl-CoA acetyltransferase                              | Swol_0675                               | 62.6  | 0         | Slip_0499                                     | 65.8 | 0         |
| <b>CoA transferase</b>                                    |                                                                         |                                         |       |           |                                               |      |           |
| SWMB_00469                                                | Succinyl-CoA:coenzyme A transferase                                     | Swol_0436                               | 72.0  | 0         | Slip_0882                                     | 62.0 | 0         |
| SWMB_00650                                                | Acyl-CoA:acetate/3-ketoacid CoA transferase                             | Swol_1482                               | 96.0  | 0         | Slip_0287                                     | 80.9 | 0         |
| SWMB_00651                                                | Acyl-CoA:acetate/3-ketoacid CoA transferase                             | Swol_1481                               | 99.3  | 0         | Slip_0288                                     | 80.8 | 8E-167    |
| SWMB_01218                                                | Succinyl-CoA:coenzyme A transferase                                     | Swol_1014                               | 96.2  | 0         | Slip_0882                                     | 57.3 | 0         |
| SWMB_01500                                                | Succinyl-CoA:coenzyme A transferase                                     | Swol_1932                               | 99.8  | 0         | Slip_0882                                     | 56.5 | 0         |
| SWMB_01699                                                | Acyl-CoA:acetate/3-ketoacid CoA transferase                             | Swol_0436                               | 97.3  | 0         | Slip_0882                                     | 60.8 | 0         |
| SWMB_01700                                                | Acyl-CoA:acetate/3-ketoacid CoA transferase                             | Swol_0309                               | 50.3  | 3.00E-162 | Slip_0500                                     | 50.3 | 9E-164    |
| SWMB_01907                                                | Succinyl-CoA:coenzyme A transferase                                     | Swol_1735                               | 98.6  | 0         | Slip_0665                                     | 40.2 | 2E-108    |
| SWMB_01923                                                | butyryl-CoA:acetate CoA-transferase                                     | Swol_1744                               | 95.9  | 1E-119    | Slip_0665                                     | 31.9 | 1E-24     |
| SWMB_02359                                                | Succinyl-CoA:coenzyme A transferase                                     | Swol_1147                               | 96.7  | 0         | Slip_0500                                     | 62.6 | 0         |
| SWMB_02505                                                | Acyl-CoA:acetate/3-ketoacid CoA transferase                             | Swol_1147                               | 63.1  | 0         | Slip_0500                                     | 59.2 | 0         |
| SWMB_03019                                                | butyryl-CoA:acetate CoA-transferase                                     | Swol_1932                               | 34.3  | 2E-11     | Slip_0882                                     | 29.1 | 0.0000007 |
| SWMB_03052                                                | Succinyl-CoA:coenzyme A transferase                                     | Swol_0787                               | 98.2  | 4E-123    | Slip_0500                                     | 73.1 | 0         |
| <b>Acetate kinase/phosphotransacetylase gene cassette</b> |                                                                         |                                         |       |           |                                               |      |           |
| SWMB_02801                                                | Phosphate acetyltransferase (phosphotransacetylase)                     | Swol_0767                               | 98.48 | 0         | Slip_0902                                     | 77.9 | 0         |
| SWMB_02802                                                | Acetate kinase                                                          | Swol_0768                               | 98.5  | 0         | Slip_0903                                     | 82.1 | 0         |
| <b>Acyl-CoA synthetase</b>                                |                                                                         |                                         |       |           |                                               |      |           |
| SWMB_02363                                                | Long-chain-fatty-acid--CoA ligase (for PHA metabolism?)                 | Swol_1144                               | 93.6  | 0         | Slip_0583                                     | 25.9 | 4E-26     |
| SWMB_02710                                                | Long-chain-fatty-acid--CoA ligase FadD13 (for coenzyme A biosynthesis?) | Swol_1180                               | 99.3  | 0         | Slip_1686                                     | 64.4 | 0         |

The gray bars indicate that there are no corresponding genes with significant similarity (&lt;20%).

Table S5. *Syntrophothermus lipocalidus* strain TGB-C1 genes encoding  $\beta$ -oxidation pathway.

| Locus tag                                                 | Gene product                                                                            | Best BLAST hit in:                      |       |           |                                                                         |      |           |
|-----------------------------------------------------------|-----------------------------------------------------------------------------------------|-----------------------------------------|-------|-----------|-------------------------------------------------------------------------|------|-----------|
|                                                           |                                                                                         | <i>Syntrophomonas wolfei</i> Goettingen |       |           | <i>Syntrophomonas wolfei</i><br>subsp. <i>metylbutyratica</i> JCM14075T |      |           |
|                                                           |                                                                                         | Locus tag                               | %ID   | e-value   | Locus tag                                                               | %ID  | e-value   |
| <b>Acyl-CoA dehydrogenase</b>                             |                                                                                         |                                         |       |           |                                                                         |      |           |
| Slip_0286                                                 | acyl-CoA dehydrogenase                                                                  | Swol_1483                               | 84.3  | 0         | SWMB_00649                                                              | 83.5 | 0         |
| Slip_0481                                                 | acyl-CoA dehydrogenase                                                                  | Swol_0384                               | 57.0  | 0         | SWMB_02510                                                              | 54.9 | 0         |
| Slip_0501                                                 | acyl-CoA dehydrogenase                                                                  | Swol_0788                               | 70.2  | 0         | SWMB_01701                                                              | 73.9 | 0         |
| Slip_0581                                                 | acyl-CoA dehydrogenase domain protein                                                   | Swol_0788                               | 34.8  | 4.00E-66  | SWMB_01701                                                              | 37.4 | 9.00E-72  |
| Slip_0881                                                 | acyl-CoA dehydrogenase                                                                  | Swol_1933                               | 72.1  | 0         | SWMB_01499                                                              | 72.0 | 0         |
| Slip_0884                                                 | acyl-CoA dehydrogenase                                                                  |                                         |       |           |                                                                         |      |           |
| Slip_1241                                                 | Butyryl-CoA dehydrogenase                                                               | Swol_0788                               | 44.5  | 9.00E-112 | SWMB_01942                                                              | 75.3 | 0         |
| Slip_1986                                                 | acyl-CoA dehydrogenase                                                                  |                                         |       |           |                                                                         |      |           |
| Slip_1987                                                 | short-chain dehydrogenase/reductase                                                     |                                         |       |           |                                                                         |      |           |
| Slip_2083                                                 | acyl-CoA dehydrogenase                                                                  |                                         |       |           |                                                                         |      |           |
| Slip_2087                                                 | short-chain dehydrogenase/reductase                                                     |                                         |       |           |                                                                         |      |           |
| <b>Enoyl-CoA hydratase</b>                                |                                                                                         |                                         |       |           |                                                                         |      |           |
| Slip_0485                                                 | short chain enoyl-CoA hydratase                                                         |                                         |       |           |                                                                         |      |           |
| Slip_0486                                                 | Enoyl-CoA hydratase/isomerase                                                           |                                         |       |           |                                                                         |      |           |
| Slip_0490                                                 | Enoyl-CoA hydratase                                                                     |                                         |       |           |                                                                         |      |           |
| Slip_0502                                                 | short chain enoyl-CoA hydratase                                                         | Swol_2031                               | 50.4  | 2.00E-83  | SWMB_03023                                                              | 68.0 | 2.00E-125 |
| Slip_0580                                                 | enoyl-CoA hydratase/isomerase                                                           | Swol_2031                               | 47.7  | 9.00E-79  | SWMB_01498                                                              | 48.1 | 2.00E-77  |
| Slip_1234                                                 | 3-hydroxybutyryl-CoA dehydrogenase                                                      | Swol_1936                               | 43.5  | 4.00E-72  | SWMB_01090                                                              | 30.1 | 7.00E-22  |
| Slip_1989                                                 | Enoyl-CoA hydratase/isomerase                                                           |                                         |       |           |                                                                         |      |           |
| Slip_2089                                                 | Enoyl-CoA hydratase/isomerase                                                           | Swol_2566                               | 36.6  | 5.00E-41  | SWMB_00384                                                              | 37.2 | 2.00E-44  |
| Slip_2197                                                 | short chain enoyl-CoA hydratase                                                         | Swol_1936                               | 67.3  | 3.00E-123 | SWMB_01496                                                              | 66.5 | 3.00E-122 |
| <b>3-hydroxybutyryl-CoA dehydrogenase</b>                 |                                                                                         |                                         |       |           |                                                                         |      |           |
| Slip_0285                                                 | 3-hydroxyacyl-CoA dehydrogenase                                                         | Swol_1485                               | 83.7  | 1.00E-180 | SWMB_00647                                                              | 82.6 | 7.00E-180 |
| Slip_0503                                                 | 3-hydroxyacyl-CoA dehydrogenase                                                         | Swol_1935                               | 55.6  | 4.00E-109 | SWMB_01704                                                              | 71.3 | 1.00E-150 |
| Slip_0579                                                 | 3-hydroxyacyl-CoA dehydrogenase NAD-binding protein                                     | Swol_1935                               | 47.3  | 3.00E-92  | SWMB_01497                                                              | 47.3 | 5.00E-92  |
| Slip_1238                                                 | 3-hydroxybutyryl-CoA dehydrogenase                                                      | Swol_1935                               | 54.7  | 1.00E-110 | SWMB_01947                                                              | 73.2 | 2.00E-101 |
| Slip_1415                                                 | 3-hydroxybutyryl-CoA dehydrogenase                                                      | Swol_1935                               | 82.8  | 2.00E-172 | SWMB_01497                                                              | 82.4 | 5.00E-172 |
| Slip_2088                                                 | putative 3-hydroxybutyryl-CoA dehydrogenase                                             |                                         |       |           |                                                                         |      |           |
| <b>Acetyl-CoA acetyltransferase</b>                       |                                                                                         |                                         |       |           |                                                                         |      |           |
| Slip_0284                                                 | acetyl-CoA acetyltransferase                                                            | Swol_1486                               | 62.8  | 2.00E-177 | SWMB_00646                                                              | 62.8 | 8.00E-178 |
| Slip_0464                                                 | Propanoyl-CoA C-acyltransferase                                                         |                                         |       |           |                                                                         |      |           |
| Slip_0465                                                 | Acetyl-CoA acetyltransferase                                                            |                                         |       |           |                                                                         |      |           |
| Slip_0479                                                 | Acetyl-CoA acetyltransferase                                                            |                                         |       |           |                                                                         |      |           |
| Slip_0499                                                 | Acetyl-CoA acetyltransferase                                                            | Swol_0675                               | 67.0  | 0         | SWMB_02161                                                              | 67.3 | 0         |
| Slip_0577                                                 | putative acetyl-CoA acetyltransferase                                                   | Swol_2051                               | 28.2  | 1.00E-33  | SWMB_01702                                                              | 30.0 | 1.00E-34  |
| Slip_0880                                                 | Acetyl-CoA acetyltransferase                                                            | Swol_2051                               | 80.3  | 0         | SWMB_02099                                                              | 81.1 | 0         |
| Slip_1111                                                 | Acetyl-CoA acetyltransferase                                                            |                                         |       |           |                                                                         |      |           |
| Slip_1236                                                 | Acetyl-CoA acetyltransferase                                                            | Swol_2051                               | 22.9  | 8.00E-11  | SWMB_01703                                                              | 47.1 | 7.00E-85  |
| Slip_1985                                                 | acetyl-CoA acetyltransferase                                                            |                                         |       |           |                                                                         |      |           |
| Slip_1988                                                 | acetyl-CoA acetyltransferase                                                            |                                         |       |           |                                                                         |      |           |
| Slip_2084                                                 | Crotonobetainyl-CoA: carnitine CoA-transferase CaiB and related acyl-CoA transferases   |                                         |       |           |                                                                         |      |           |
| Slip_2085                                                 | acetyl-CoA acetyltransferase                                                            |                                         |       |           |                                                                         |      |           |
| <b>CoA transferase</b>                                    |                                                                                         |                                         |       |           |                                                                         |      |           |
| Slip_0098                                                 | putative acyl CoA:acetate/3-ketoacid CoA transferase, alpha subunit                     |                                         |       |           | SWMB_01948                                                              | 72.4 | 6.00E-67  |
| Slip_0099                                                 | putative acyl CoA:acetate/3-ketoacid CoA transferase, beta subunit                      |                                         |       |           |                                                                         |      |           |
| Slip_0287                                                 | coenzyme A transferase                                                                  | Swol_1482                               | 78.5  | 0         | SWMB_00650                                                              | 80.9 | 0         |
| Slip_0288                                                 | putative acyl CoA:acetate/3-ketoacid CoA transferase                                    | Swol_1481                               | 80.4  | 4.00E-166 | SWMB_00651                                                              | 80.8 | 8.00E-167 |
| Slip_0500                                                 | acetyl-CoA hydrolase/transferase                                                        | Swol_0309                               | 74.7  | 0         | SWMB_03052                                                              | 73.1 | 0         |
| Slip_0578                                                 | putative CoA-transferase family III                                                     |                                         |       |           |                                                                         |      |           |
| Slip_0665                                                 | putative 4-hydroxybutyrate CoA-transferase                                              | Swol_1744                               | 40.1  | 9.00E-109 | SWMB_01907                                                              | 40.2 | 2.00E-108 |
| Slip_1192                                                 | coenzyme A transferase                                                                  |                                         |       |           |                                                                         |      |           |
| Slip_1193                                                 | coenzyme A transferase                                                                  |                                         |       |           |                                                                         |      |           |
| Slip_1195                                                 | putative acyl CoA:acetate/3-ketoacid CoA transferase beta subunit                       |                                         |       |           |                                                                         |      |           |
| Slip_1196                                                 | putative acyl CoA:acetate/3-ketoacid CoA transferase alpha subunit                      |                                         |       |           |                                                                         |      |           |
| Slip_1239                                                 | Acyl-CoA:acetate/3-ketoacid CoA transferase                                             | Swol_1481                               | 41.4  | 7.00E-54  | SWMB_00651                                                              | 41.4 | 9.00E-54  |
| Slip_1240                                                 | Acyl-CoA:acetate/3-ketoacid CoA transferase                                             | Swol_1482                               | 29.1  | 3.00E-29  | SWMB_01944                                                              | 30.7 | 2.00E-35  |
| Slip_1981                                                 | CoA-transferase family III domain                                                       |                                         |       |           |                                                                         |      |           |
| <b>Acetate kinase/phosphotransacetylase gene cassette</b> |                                                                                         |                                         |       |           |                                                                         |      |           |
| Slip_0902                                                 | Phosphate acetyltransferase (phosphotransacetylase)                                     | Swol_0767                               | 76.7  | 0         | SWMB_02801                                                              | 77.9 | 0         |
| Slip_0903                                                 | Acetate kinase                                                                          | Swol_0768                               | 82.12 | 0         | SWMB_02802                                                              | 82.1 | 0         |
| <b>Isomerization</b>                                      |                                                                                         |                                         |       |           |                                                                         |      |           |
| Slip_0757                                                 | Cob(I)alamin adenosyltransferase                                                        |                                         |       |           |                                                                         |      |           |
| Slip_0758                                                 | Isobutyryl-CoA mutase, N-terminal domain subunit                                        |                                         |       |           |                                                                         |      |           |
| Slip_0759                                                 | Isobutyryl-CoA mutase, C-terminal domain subunit (cobalamin B12-binding domain protein) |                                         |       |           |                                                                         |      |           |
| Slip_0760                                                 | LAO/AO transport system ATPase, MeaB-like protein                                       |                                         |       |           |                                                                         |      |           |
| <b>Acyl-CoA synthetase</b>                                |                                                                                         |                                         |       |           |                                                                         |      |           |
| Slip_1686                                                 | Acyl-CoA synthetase (AMP-forming)/AMP-acid ligase II (for coenzyme A biosynthesis?)     | Swol_1180                               | 64.4  | 0         | SWMB_02710                                                              | 64.4 | 0         |
| Slip_0583                                                 | Acyl-CoA synthetase (AMP-forming)/AMP-acid ligase II                                    | Swol_1180                               | 31.1  | 6.00E-67  | SWMB_02710                                                              | 30.6 | 5.00E-72  |
| Slip_0475                                                 | Acyl-CoA synthetase (AMP-forming)/AMP-acid ligase II                                    |                                         |       |           |                                                                         |      |           |

The gray bars indicate that there are no corresponding genes with significant similarity (&lt;20%).

Table S6. *Syntrophomonas wolfei* subsp. *meritlithytratica* strain 415<sup>T</sup> genes encoding syntrophic electron flow

| Locus tag in JCM14075                                                                                                                       | Predicted product                                                         | <i>Syntrophomonas wolfei</i> Goettingen |       |         | <i>Syntrophomonas lipocalculus</i> TGB-C1 |      |         | Locus tag in TGB-C1 | Predicted product                                         | Closely related strain                                    |            |         |   |
|---------------------------------------------------------------------------------------------------------------------------------------------|---------------------------------------------------------------------------|-----------------------------------------|-------|---------|-------------------------------------------|------|---------|---------------------|-----------------------------------------------------------|-----------------------------------------------------------|------------|---------|---|
|                                                                                                                                             |                                                                           | Locus Tag                               | %ID   | e-value | Locus Tag                                 | %ID  | e-value |                     |                                                           | Locus Tag                                                 | %ID        | e-value |   |
| <b>Electron-bifurcating [FeFe] hydrogenase (H<sup>+</sup> + NADH + Fd<sub>ox</sub> ↔ H<sub>2</sub> + NAD<sup>+</sup> + Fd<sub>ox</sub>)</b> |                                                                           |                                         |       |         |                                           |      |         |                     |                                                           |                                                           |            |         |   |
| SWMB_01221                                                                                                                                  | Fe-only hydrogenase                                                       | Swol_1017                               | 98.1  | 0       | Slip_0125                                 | 81.4 | 0       |                     |                                                           |                                                           |            |         |   |
| SWMB_01222                                                                                                                                  | NADH:UQ oxidoreductase, 51 kDa subunit                                    | Swol_1018                               | 98.5  | 0       | Slip_0124                                 | 76.6 | 0       |                     |                                                           |                                                           |            |         |   |
| SWMB_01223                                                                                                                                  | NADH:UQ oxidoreductase, 24 kDa subunit                                    | Swol_1019                               | 98.0  | 8E-104  | Slip_0123                                 | 73.5 | 2E-72   |                     |                                                           |                                                           |            |         |   |
| <b>Ferredoxin [FeFe] hydrogenase (H<sup>+</sup> + Fd<sub>ox</sub> ↔ H<sub>2</sub> + Fd<sub>ox</sub>)</b>                                    |                                                                           |                                         |       |         |                                           |      |         |                     |                                                           |                                                           |            |         |   |
| SWMB_00486                                                                                                                                  | NADP-reducing hydrogenase subunit HndC                                    | Swol_2436                               | 97.5  | 0       | Slip_0543                                 | 82.4 | 0       |                     |                                                           |                                                           |            |         |   |
| <b>Periplasmic [FeFe] hydrogenase (MQ ↔ H<sub>2</sub>)</b>                                                                                  |                                                                           |                                         |       |         |                                           |      |         |                     |                                                           |                                                           |            |         |   |
| SWMB_01505                                                                                                                                  | Cytochrome b(N-terminal)/b6/pefB                                          | Swol_1927                               | 95.6  | 3E-154  | Slip_1532                                 | 71.2 | 3E-120  |                     |                                                           |                                                           |            |         |   |
| SWMB_01506                                                                                                                                  | Periplasmic [Fe] hydrogenase small subunit precursor                      | Swol_1926                               | 92.3  | 1E-79   | Slip_1533                                 | 68.7 | 5E-57   |                     |                                                           |                                                           |            |         |   |
| SWMB_01507                                                                                                                                  | Periplasmic [Fe] hydrogenase large subunit                                | Swol_1925                               | 93.6  | 0       | Slip_1534                                 | 76.6 | 0       |                     |                                                           |                                                           |            |         |   |
| <b>Periplasmic [NiFe] hydrogenase (MQ ↔ H<sub>2</sub>)</b>                                                                                  |                                                                           |                                         |       |         |                                           |      |         |                     |                                                           |                                                           |            |         |   |
| SWMB_01823                                                                                                                                  | Hydrogenase expression/formation protein HypE                             |                                         |       |         | Slip_0392                                 | 64.6 | 1E-158  |                     |                                                           |                                                           |            |         |   |
| SWMB_01824                                                                                                                                  | Hydrogenase expression/formation protein HypD                             |                                         |       |         | Slip_0391                                 | 67.4 | 1E-179  |                     |                                                           |                                                           |            |         |   |
| SWMB_01825                                                                                                                                  | Hydrogenase isoenzymes formation protein HypC                             |                                         |       |         | Slip_0390                                 | 65.3 | 3E-32   |                     |                                                           |                                                           |            |         |   |
| SWMB_01826                                                                                                                                  | [NiFe] hydrogenase maturation protein HypF                                |                                         |       |         | Slip_0389                                 | 63.9 | 0       |                     |                                                           |                                                           |            |         |   |
| SWMB_01827                                                                                                                                  | Hydrogenase 2 maturation protease                                         |                                         |       |         | Slip_0388                                 | 47.4 | 3E-45   |                     |                                                           |                                                           |            |         |   |
| SWMB_01828                                                                                                                                  | putative Ni/Fe-hydrogenase 1 β-type cytochrome subunit, hyaC              |                                         |       |         | Slip_0387                                 | 71.2 | 2E-107  |                     |                                                           |                                                           |            |         |   |
| SWMB_01829                                                                                                                                  | Periplasmic [NiFeSe] hydrogenase large subunit, hyaB                      |                                         |       |         | Slip_0386                                 | 70.5 | 0       |                     |                                                           |                                                           |            |         |   |
| SWMB_01830                                                                                                                                  | Periplasmic [NiFe] hydrogenase large subunit precursor, hyaA              |                                         |       |         | Slip_0385                                 | 73.0 | 4E-18   |                     |                                                           |                                                           |            |         |   |
| SWMB_01831                                                                                                                                  | Periplasmic [NiFeSe] hydrogenase small subunit precursor                  |                                         |       |         | Slip_0384                                 | 76.9 | 0       |                     |                                                           |                                                           |            |         |   |
| SWMB_01832                                                                                                                                  | Hydrogenase isoenzymes nickel incorporation protein HypB                  |                                         |       |         | Slip_0384                                 | 59.7 | 1E-92   |                     |                                                           |                                                           |            |         |   |
| SWMB_01833                                                                                                                                  | Hydrogenase nickel incorporation protein HypA/HypF                        |                                         |       |         | Slip_0383                                 | 49.1 | 2E-37   |                     |                                                           |                                                           |            |         |   |
| <b>Energy conserving hydrogenase, Ech (H<sup>+</sup> + Fd<sub>ox</sub> ↔ H<sub>2</sub> + Fd<sub>ox</sub>)</b>                               |                                                                           |                                         |       |         |                                           |      |         |                     |                                                           |                                                           |            |         |   |
|                                                                                                                                             |                                                                           |                                         |       |         |                                           |      |         | Slip_0655           | echA ech hydrogenase subunit A                            | Tph_c21360                                                | 41.6       | 3E-141  |   |
|                                                                                                                                             |                                                                           |                                         |       |         |                                           |      |         | Slip_0656           | echB ech hydrogenase subunit B                            | Tph_c21350                                                | 50.4       | 5E-87   |   |
|                                                                                                                                             |                                                                           |                                         |       |         |                                           |      |         | Slip_0657           | echC ech hydrogenase subunit C                            | Tph_c21340                                                | 66.2       | 4E-65   |   |
|                                                                                                                                             |                                                                           |                                         |       |         |                                           |      |         | Slip_0658           | echD ech hydrogenase subunit D                            | Tph_c21330                                                | 34.8       | 1E-15   |   |
|                                                                                                                                             |                                                                           |                                         |       |         |                                           |      |         | Slip_0659           | echE ech hydrogenase subunit E                            | Tph_c21320                                                | 54.4       | 5E-139  |   |
|                                                                                                                                             |                                                                           |                                         |       |         |                                           |      |         | Slip_0660           | NADH:ubiquinone reductase (H <sup>+</sup> )-translocating | Tph_c21310                                                | 41.5       | 1E-20   |   |
| <b>Formate dehydrogenase O (Formate ↔ MQ)</b>                                                                                               |                                                                           |                                         |       |         |                                           |      |         |                     |                                                           |                                                           |            |         |   |
| SWMB_01402                                                                                                                                  | Molybdopterin molybdenumtransferase                                       | Swol_0802                               | 95.5  | 0       | Slip_0566                                 | 52.8 | 7E-152  |                     |                                                           |                                                           |            |         |   |
| SWMB_01403                                                                                                                                  | Molybdopterin molybdenumtransferase                                       | Swol_0801                               | 95.5  | 0       | Slip_0567                                 | 56.9 | 0       |                     |                                                           |                                                           |            |         |   |
| SWMB_01404                                                                                                                                  | Formate dehydrogenase subunit alpha precursor, fdoG                       | Swol_0800                               | 96.2  | 1E-152  | Slip_1434                                 | 77.5 | 9E-115  |                     |                                                           |                                                           |            |         |   |
| SWMB_01405                                                                                                                                  | Formate dehydrogenase subunit alpha precursor, fdoG                       | Swol_0799                               | 96.9  | 0       | Slip_1434                                 | 70.4 | 0       |                     |                                                           |                                                           |            |         |   |
| SWMB_01406                                                                                                                                  | Formate dehydrogenase-N subunit beta, fdoH                                | Swol_0798                               | 98.5  | 0       | Slip_1433                                 | 58.1 | 5E-121  |                     |                                                           |                                                           |            |         |   |
| SWMB_01407                                                                                                                                  | Formate dehydrogenase-N subunit gamma, fdoI                               | Swol_0797                               | 99.6  | 5E-169  | Slip_1432                                 | 74.0 | 7E-125  |                     |                                                           |                                                           |            |         |   |
| SWMB_01408                                                                                                                                  | formate dehydrogenase accessory protein FdhE                              | Swol_0796                               | 95.3  | 0       | Slip_1431                                 | 35.4 | 1E-67   |                     |                                                           |                                                           |            |         |   |
| SWMB_01533                                                                                                                                  | Formate dehydrogenase subunit alpha precursor, fdoG                       | Swol_1826                               | 98.5  | 8E-145  |                                           |      |         |                     |                                                           |                                                           |            |         |   |
| SWMB_01535                                                                                                                                  | Formate dehydrogenase, nitrate-insoluble, major subunit precursor, fdoG   | Swol_1825                               | 92.5  | 0       |                                           |      |         |                     |                                                           |                                                           |            |         |   |
| SWMB_01536                                                                                                                                  | Formate dehydrogenase-N subunit beta, fdoH                                | Swol_1824                               | 93.3  | 0       |                                           |      |         |                     |                                                           |                                                           |            |         |   |
| SWMB_01537                                                                                                                                  | Formate dehydrogenase-O subunit gamma, fdoI                               | Swol_1823                               | 96.4  | 3E-158  |                                           |      |         |                     |                                                           |                                                           |            |         |   |
| SWMB_01538                                                                                                                                  | formate dehydrogenase accessory protein FdhE                              | Swol_1822                               | 93.3  | 4E-180  |                                           |      |         |                     |                                                           |                                                           |            |         |   |
| SWMB_01539                                                                                                                                  | putative molybdopterin biosynthesis protein MoeA/LysR substrate binding-d | Swol_1821                               | 94.9  | 0       |                                           |      |         |                     |                                                           |                                                           |            |         |   |
| <b>Electron-bifurcating formate dehydrogenase (CO<sub>2</sub> + NADH + Fd<sub>ox</sub> ↔ Formate + NAD<sup>+</sup> + Fd<sub>ox</sub>)</b>   |                                                                           |                                         |       |         |                                           |      |         |                     |                                                           |                                                           |            |         |   |
| SWMB_02818                                                                                                                                  | NADH-quinone oxidoreductase subunit E                                     | Swol_0783                               | 96.0  | 4E-103  |                                           |      |         |                     |                                                           |                                                           |            |         |   |
| SWMB_02819                                                                                                                                  | NADP-reducing hydrogenase subunit HndC                                    | Swol_0784                               | 98.3  | 0       |                                           |      |         |                     |                                                           |                                                           |            |         |   |
| SWMB_02820                                                                                                                                  | Putative formate dehydrogenase/NADH-ubiquinone oxidoreductase-G           | Swol_0785                               | 97.2  | 0       |                                           |      |         |                     |                                                           |                                                           |            |         |   |
| SWMB_02821                                                                                                                                  | Formate dehydrogenase H                                                   | Swol_0786                               | 98.3  | 0       |                                           |      |         |                     |                                                           |                                                           |            |         |   |
| SWMB_01527                                                                                                                                  | Putative formate dehydrogenase                                            | Swol_1831                               | 98.6  | 0       |                                           |      |         |                     |                                                           |                                                           |            |         |   |
| SWMB_01528                                                                                                                                  | Formate dehydrogenase H                                                   | Swol_1830                               | 98.0  | 0       |                                           |      |         |                     |                                                           |                                                           |            |         |   |
| SWMB_01529                                                                                                                                  | NADP-reducing hydrogenase subunit HndA                                    | Swol_1829                               | 96.6  | 2E-103  |                                           |      |         |                     |                                                           |                                                           |            |         |   |
| SWMB_01530                                                                                                                                  | NADP-reducing hydrogenase subunit HndC                                    | Swol_1828                               | 98.8  | 0       |                                           |      |         |                     |                                                           |                                                           |            |         |   |
| SWMB_01228                                                                                                                                  | NADP-reducing hydrogenase subunit HndC                                    | Swol_1024                               | 98.5  | 0       |                                           |      |         |                     |                                                           |                                                           |            |         |   |
| SWMB_01229                                                                                                                                  | NADP-reducing hydrogenase subunit HndA                                    | Swol_1025                               | 97.3  | 3E-106  |                                           |      |         |                     |                                                           |                                                           |            |         |   |
| SWMB_01230                                                                                                                                  | Molybdopterin molybdenumtransferase                                       | Swol_1026                               | 94.5  | 0       |                                           |      |         |                     |                                                           |                                                           |            |         |   |
| SWMB_01231                                                                                                                                  | bifunctional molybdenum cofactor biosynthesis protein MoeC/MogA           | Swol_1027                               | 96.5  | 0       |                                           |      |         |                     |                                                           |                                                           |            |         |   |
| SWMB_01232                                                                                                                                  | Formate dehydrogenase H                                                   | Swol_1028                               | 98.7  | 0       |                                           |      |         |                     |                                                           |                                                           |            |         |   |
| SWMB_01233                                                                                                                                  | Putative formate dehydrogenase                                            | Swol_1029                               | 98.9  | 0       |                                           |      |         |                     |                                                           |                                                           |            |         |   |
| <b>NAD-dependent formate dehydrogenase (CO<sub>2</sub> + NADH ↔ Formate + NAD<sup>+</sup>)</b>                                              |                                                                           |                                         |       |         |                                           |      |         |                     |                                                           |                                                           |            |         |   |
|                                                                                                                                             |                                                                           |                                         |       |         |                                           |      |         | Slip_1031           | Formate dehydrogenase (NADP) alpha subunit                | <i>S. wolfei</i> subsp. <i>meritlithytratica</i> JCM14075 | SWMB_02820 | 66.7    | 0 |
|                                                                                                                                             |                                                                           |                                         |       |         |                                           |      |         | Slip_1032           | Formate dehydrogenase (NADP) alpha subunit                | SWMB_02821                                                | 69.4       | 0       |   |
| <b>Flox-Hdr system</b>                                                                                                                      |                                                                           |                                         |       |         |                                           |      |         |                     |                                                           |                                                           |            |         |   |
| SWMB_01721                                                                                                                                  | Heterodisulfide reductase subunit C (HdC)                                 | Swol_0394                               | 100.0 | 4E-139  | Slip_2075                                 | 63.4 | 2E-86   |                     |                                                           |                                                           |            |         |   |
| SWMB_01720                                                                                                                                  | Heterodisulfide reductase subunit B (HdB)                                 | Swol_0395                               | 92.1  | 0       | Slip_2074                                 | 65.9 | 6E-142  |                     |                                                           |                                                           |            |         |   |
| SWMB_01719                                                                                                                                  | Heterodisulfide reductase subunit A (HdA)                                 | Swol_0396                               | 99.0  | 5E-144  |                                           |      |         |                     |                                                           |                                                           |            |         |   |
| SWMB_01718                                                                                                                                  | Heterodisulfide reductase subunit A (HdA)                                 | Swol_0397                               | 98.9  | 0       | Slip_2073                                 | 75.5 | 0       |                     |                                                           |                                                           |            |         |   |
| SWMB_01717                                                                                                                                  | Hydrogenase subunit D (HdD)                                               | Swol_0398-0399                          | 97.1  | 4E-47   | Slip_2072                                 | 74.7 | 1E-34   |                     |                                                           |                                                           |            |         |   |
| SWMB_01716                                                                                                                                  | Hydrogenase subunit B (HdB)                                               | Swol_0400                               | 98.3  | 0       | Slip_2071                                 | 61.2 | 2E-143  |                     |                                                           |                                                           |            |         |   |
| SWMB_01715                                                                                                                                  | Flavoprotein oxidoreductase subunit A (FloxA)                             | Swol_0401                               | 97.6  | 0       | Slip_2070                                 | 55.5 | 2E-134  |                     |                                                           |                                                           |            |         |   |
| SWMB_01714                                                                                                                                  | Flavoprotein oxidoreductase subunit B (FloxB)                             | Swol_0402                               | 98.2  | 0       | Slip_2069                                 | 76.4 | 5E-162  |                     |                                                           |                                                           |            |         |   |
| <b>Fix system (+AD)</b>                                                                                                                     |                                                                           |                                         |       |         |                                           |      |         |                     |                                                           |                                                           |            |         |   |
| SWMB_01042                                                                                                                                  | acyl-CoA dehydrogenase                                                    | Swol_2126                               | 98.7  | 0       | Slip_0874                                 | 38.6 | 3E-87   |                     |                                                           |                                                           |            |         |   |
| SWMB_01043                                                                                                                                  | ETF-ubiquinone oxidoreductase (FixC)                                      | Swol_2124                               | 98.4  | 0       | Slip_0877                                 | 47.9 | 3E-127  |                     |                                                           |                                                           |            |         |   |
| SWMB_01044                                                                                                                                  | Ferredoxin (FixX)                                                         | Swol_2123                               | 95.7  | 2E-63   | Slip_0878                                 | 42.4 | 4E-16   |                     |                                                           |                                                           |            |         |   |
| SWMB_01045                                                                                                                                  | Electron transfer flavoprotein β subunit (FixA)                           | Swol_2122                               | 94.4  | 2E-148  | Slip_0875                                 | 35.5 | 2E-38   |                     |                                                           |                                                           |            |         |   |
| SWMB_01046                                                                                                                                  | Electron transfer flavoprotein α subunit (FixB)                           | Swol_2121                               | 96.5  | 0       | Slip_0876                                 | 36.6 | 4E-58   |                     |                                                           |                                                           |            |         |   |
| <b>Fix system (+AD/EH/CT)</b>                                                                                                               |                                                                           |                                         |       |         |                                           |      |         |                     |                                                           |                                                           |            |         |   |
|                                                                                                                                             |                                                                           |                                         |       |         |                                           |      |         | Slip_0455           | acyl-CoA dehydrogenase                                    | <i>S. wolfei</i> subsp. <i>meritlithytratica</i> JCM14075 |            |         |   |
|                                                                                                                                             |                                                                           |                                         |       |         |                                           |      |         | Slip_0456           | acyl-CoA dehydrogenase                                    | SWMB_01042                                                | 63.1       | 2E-178  |   |
|                                                                                                                                             |                                                                           |                                         |       |         |                                           |      |         | Slip_0457           | ETF-ubiquinone oxidoreductase (FixC)                      | SWMB_01043                                                | 64.9       | 0       |   |
|                                                                                                                                             |                                                                           |                                         |       |         |                                           |      |         | Slip_0458           | Ferredoxin (FixX)                                         | SWMB_01044                                                | 64.9       | 4E-41   |   |
|                                                                                                                                             |                                                                           |                                         |       |         |                                           |      |         | Slip_0459           | Electron transfer flavoprotein β subunit (FixA)           | SWMB_01045                                                | 59.3       | 1E-96   |   |
|                                                                                                                                             |                                                                           |                                         |       |         |                                           |      |         | Slip_0460           | Electron transfer flavoprotein α subunit (FixB)           | SWMB_01046                                                | 51.1       | 3E-101  |   |
|                                                                                                                                             |                                                                           |                                         |       |         |                                           |      |         | Slip_0461           | enoyl-CoA hydratase                                       |                                                           |            |         |   |
|                                                                                                                                             |                                                                           |                                         |       |         |                                           |      |         | Slip_0462           | butyryl-CoA:acetate CoA-transferase                       |                                                           |            |         |   |
| <b>Acyl-CoA dehydrogenase linked to ETF</b>                                                                                                 |                                                                           |                                         |       |         |                                           |      |         |                     |                                                           |                                                           |            |         |   |
| SWMB_00118                                                                                                                                  | Acyl-CoA dehydrogenase                                                    | Swol_0268                               | 99.2  | 0       | Slip_2109                                 | 40.1 | 1E-85   |                     |                                                           |                                                           |            |         |   |
| SWMB_00119                                                                                                                                  | fixA, eTfB electron transfer flavoprotein beta subunit                    | Swol_0267                               | 96.5  | 0       | Slip_2110                                 | 33.0 | 6E-36   |                     |                                                           |                                                           |            |         |   |
| SWMB_00120                                                                                                                                  | fixB, eTfA electron transfer flavoprotein alpha subunit                   | Swol_0266                               | 95.6  | 0       | Slip_2111                                 | 33.9 | 5E-43   |                     |                                                           |                                                           |            |         |   |
| <b>Iron-sulfur-binding reductase linked to ETF</b>                                                                                          |                                                                           |                                         |       |         |                                           |      |         |                     |                                                           |                                                           |            |         |   |
| SWMB_02180                                                                                                                                  | Electron transfer flavoprotein small subunit                              | Swol_0696                               | 97.2  | 2E-158  | Slip_1418                                 | 74.8 | 2E-121  |                     |                                                           |                                                           |            |         |   |
| SWMB_02181                                                                                                                                  | Electron transfer flavoprotein large subunit                              | Swol_0697                               | 99.7  | 0       | Slip_1417                                 | 79.8 | 3E-176  |                     |                                                           |                                                           |            |         |   |
| SWMB_02182                                                                                                                                  | Fe-S oxidoreductase                                                       | Swol_0698                               | 97.1  | 0       | Slip_1416                                 | 72.6 | 0       |                     |                                                           |                                                           |            |         |   |
| <b>ATP synthase</b>                                                                                                                         |                                                                           |                                         |       |         |                                           |      |         |                     |                                                           |                                                           |            |         |   |
| SWMB_00535                                                                                                                                  | Putative F <sub>0</sub> F <sub>1</sub> -ATPase subunit (ATPase_gene1)     | Swol_2389                               | 98.9  | 4E-58   | Slip_2290                                 | 51.6 | 2E-15   |                     |                                                           |                                                           |            |         |   |
| SWMB_00536                                                                                                                                  | F <sub>1</sub> -ATPase subunit 6                                          | Swol_2388                               | 98.7  | 3E-162  | Slip_2288                                 | 57.3 | 1E-93   |                     |                                                           |                                                           |            |         |   |
| SWMB_00537                                                                                                                                  | Lipid-binding protein                                                     | Swol_2387                               | 98.6  | 3E-41   | Slip_2287                                 | 77.1 | 1E-23   |                     |                                                           |                                                           |            |         |   |
| SWMB_00538                                                                                                                                  | F <sub>1</sub> -type ATPase subunit b                                     | Swol_2386                               | 98.8  | 4E-122  | Slip_2286                                 | 60.8 | 1E-83   |                     |                                                           |                                                           |            |         |   |
| SWMB_00539                                                                                                                                  | F <sub>1</sub> -type ATPase subunit delta                                 | Swol_2385                               | 97.3  | 1E-128  | Slip_2285                                 | 51.1 | 4E-64   |                     |                                                           |                                                           |            |         |   |
| SWMB_00540                                                                                                                                  | ATP synthase subunit alpha                                                | Swol_2384                               | 99.6  | 0       | Slip_2284                                 | 81.3 | 0       |                     |                                                           |                                                           |            |         |   |
| SWMB_00541                                                                                                                                  | F <sub>1</sub> -ATPase gamma subunit                                      | Swol_2383                               | 97.0  | 0       | Slip_2283                                 | 69.9 | 6E-147  |                     |                                                           |                                                           |            |         |   |
| SWMB_00542                                                                                                                                  | ATP synthase subunit beta                                                 | Swol_2382                               | 100.0 | 0       | Slip_2282                                 | 81.7 | 0       |                     |                                                           |                                                           |            |         |   |
| SWMB_00543                                                                                                                                  | F <sub>1</sub> -ATPase epsilon subunit                                    | Swol_2381                               | 100.0 | 1E-96   | Slip_2281                                 | 71.6 | 1E-67   |                     |                                                           |                                                           |            |         |   |

The gray bars indicate that there are no corresponding genes with significant similarity (<20%).

Table S7. *Syntrophothermus lipocalidus* strain TGB-C1<sup>T</sup> genes encoding nitrogenase complex

| Locus tag<br>in TGB-C1 | Predicted product                                            | <i>Thermacetogenium phaeum</i> PB |      |         | <i>Clostridium butyricum</i> CWB11009 |      |         | <i>Syntrophobacter fumaroxidans</i> MPOB |      |         |
|------------------------|--------------------------------------------------------------|-----------------------------------|------|---------|---------------------------------------|------|---------|------------------------------------------|------|---------|
|                        |                                                              | Locus Tag                         | %ID  | e-value | Locus Tag                             | %ID  | e-value | Locus Tag                                | %ID  | e-value |
| Slip_2118              | nitrogen regulatory protein P-II family                      | Tph_c08760                        | 81.3 | 2E-50   | Ga0077125_11736                       | 41.1 | 1E-26   | Sfum_0726                                | 42.0 | 1E-25   |
| Slip_2119              | ammonium transporter                                         | Tph_c08750                        | 88.8 | 0       | Ga0077125_11735                       | 44.7 | 8E-132  | Sfum_0727                                | 35.1 | 3E-58   |
| Slip_2120              | glutamine amidotransferase class-I                           | Tph_c08740                        | 81.4 | 7E-146  | Ga0077125_10774                       | 28.9 | 3.E-08  | Sfum_0596                                | 41.6 | 2E-39   |
| Slip_2121              | modC molybdate transport system ATP-binding protein          | Tph_c26420                        | 50.9 | 2E-64   | Ga0077125_115825                      | 44.6 | 3E-53   | Sfum_3696                                | 47.8 | 5E-54   |
| Slip_2122              | modB molybdate transport system permease protein             | Tph_c26410                        | 57.8 | 5E-87   | Ga0077125_115824                      | 48.6 | 2E-65   | Sfum_3698                                | 46.4 | 1E-63   |
| Slip_2123              | modA molybdate transport system substrate-binding protein    | Tph_c26400                        | 49.8 | 5E-74   | Ga0077125_115823                      | 42.0 | 1E-56   | Sfum_3697                                | 40.9 | 2E-53   |
|                        | nifV homocitrate synthase                                    | Tph_c08720                        |      |         |                                       |      |         |                                          |      |         |
| Slip_2124              | nifB nitrogen fixation protein NifB                          | Tph_c08710                        | 82.6 | 5E-167  | Ga0077125_115813                      | 41.0 | 2E-66   | Sfum_1011                                | 42.8 | 4E-69   |
|                        | Nitrogenase FeMo-cofactor scaffold and assembly protein NifN |                                   |      |         |                                       |      |         | Sfum_1012                                |      |         |
| Slip_2125              | nifE nitrogenase molybdenum-cofactor synthesis protein       | Tph_c08700                        | 93.3 | 0       | Ga0077125_115814                      | 36.7 | 2E-91   | Sfum_1013                                | 37.3 | 4E-84   |
|                        | ferredoxin, 2Fe-2s                                           |                                   |      |         |                                       |      |         | Sfum_1014                                |      |         |
| Slip_2126              | nifK nitrogenase molybdenum-iron protein beta chain          | Tph_c08690                        | 95.1 | 0       | Ga0077125_115815                      | 38.5 | 2E-101  | Sfum_1015                                | 39.5 | 4E-105  |
| Slip_2127              | nifD nitrogenase molybdenum-iron protein alpha chain         | Tph_c08680                        | 94.2 | 0       | Ga0077125_115816                      | 34.7 | 6E-97   | Sfum_1016                                | 36.3 | 3E-103  |
| Slip_2128              | nifl2 nitrogen regulatory protein PII 2                      | Tph_c08670                        | 95.9 | 1E-81   | Ga0077125_115817                      | 39.5 | 1E-24   | Sfum_1017                                | 44.0 | 2E-23   |
| Slip_2129              | nifl1 nitrogen regulatory protein PII 1                      | Tph_c08660                        | 96.2 | 2E-70   | Ga0077125_115818                      | 55.1 | 5E-34   | Sfum_1018                                | 54.7 | 2E-34   |
| Slip_2130              | nifH nitrogenase iron protein NifH                           | Tph_c08650                        | 98.2 | 0       | Ga0077125_115819                      | 68.1 | 5E-139  | Sfum_1019                                | 67.8 | 5E-136  |

The gray bars indicate that there are no corresponding genes with significant similarity (<20%).

(A) Acyl-CoA dehydrogenase-related

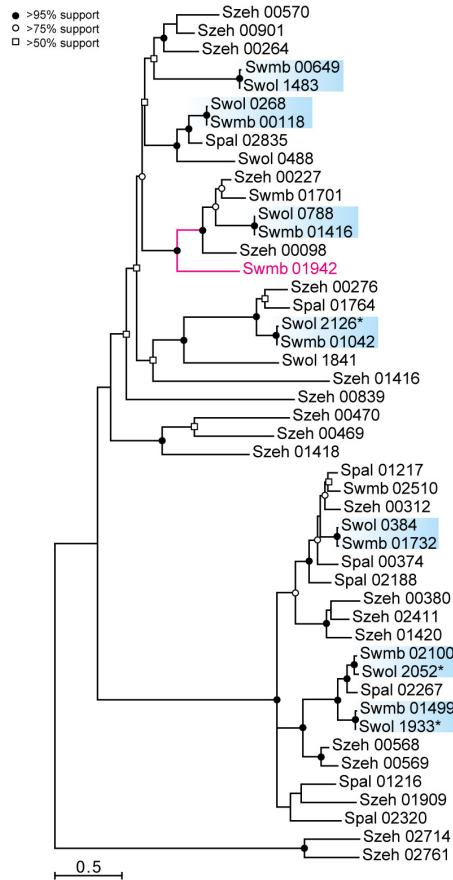

(B) Enoyl-CoA hydratase-related

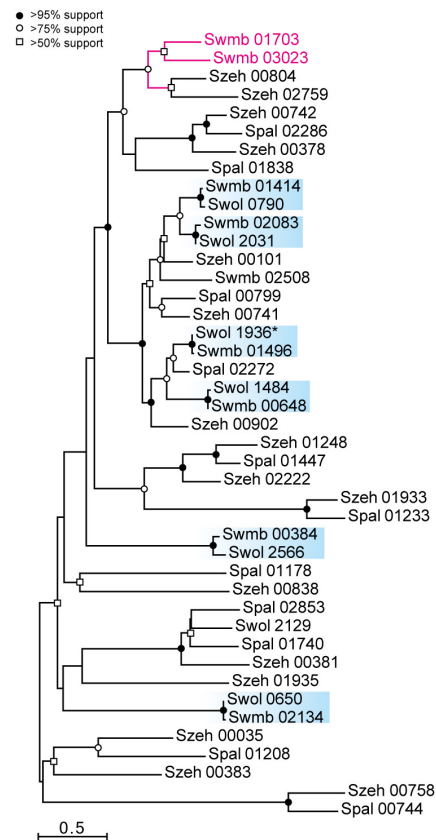

(C) 3-hydroxyacyl-CoA dehydrogenase-related

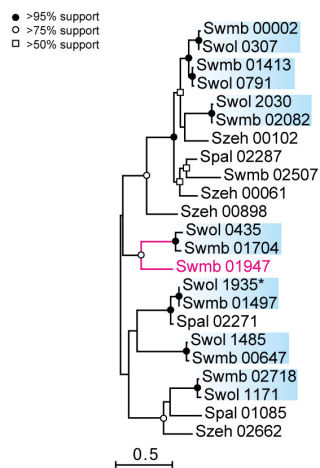

(D) Acetyl-CoA acetyltransferase-related

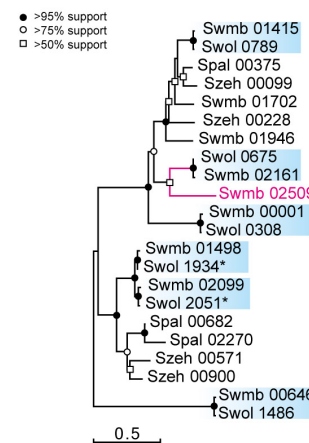

79 **Fig. S1.** Maximum likelihood trees of (A) acyl-CoA dehydrogenase, (B) enoyl-CoA  
80 dehydratase, (C) 3-hydroxyacyl-CoA dehydrogenase, and (D) acetyl-CoA acetyltransferase of  
81 genome-sequenced mesophilic *Syntrophomonadaceae* strains: *Syntrophomonas wolfei* subsp.

82 *methylbutyratica* strain 4J5 (locus tag: Swmb), *Syntrophomonas wolfei* subsp. *wolfei* strain  
83 Göttingen (Swol), *Syntrophomonas palmitatica* strain JCM 14374 (Spal), and  
84 *Syntrophomonas zehnderi* strain OL-4 (Szeh). The topology of the tree was estimated by  
85 bootstrap analysis with 1,000 replicates. Bars indicate the change per amino acid site. Locus  
86 tags of *Syntrophomonas wolfei* subsp. *wolfei* strain Göttingen with asterisk indicate  
87 significant expressed enzymes based on proteomic study (9). Cluster with blue color indicates  
88 a set of homologous gene of the strain 4J5 and Göttingen that has amino acid sequence  
89 identity range 87.4%–99.7%.

90

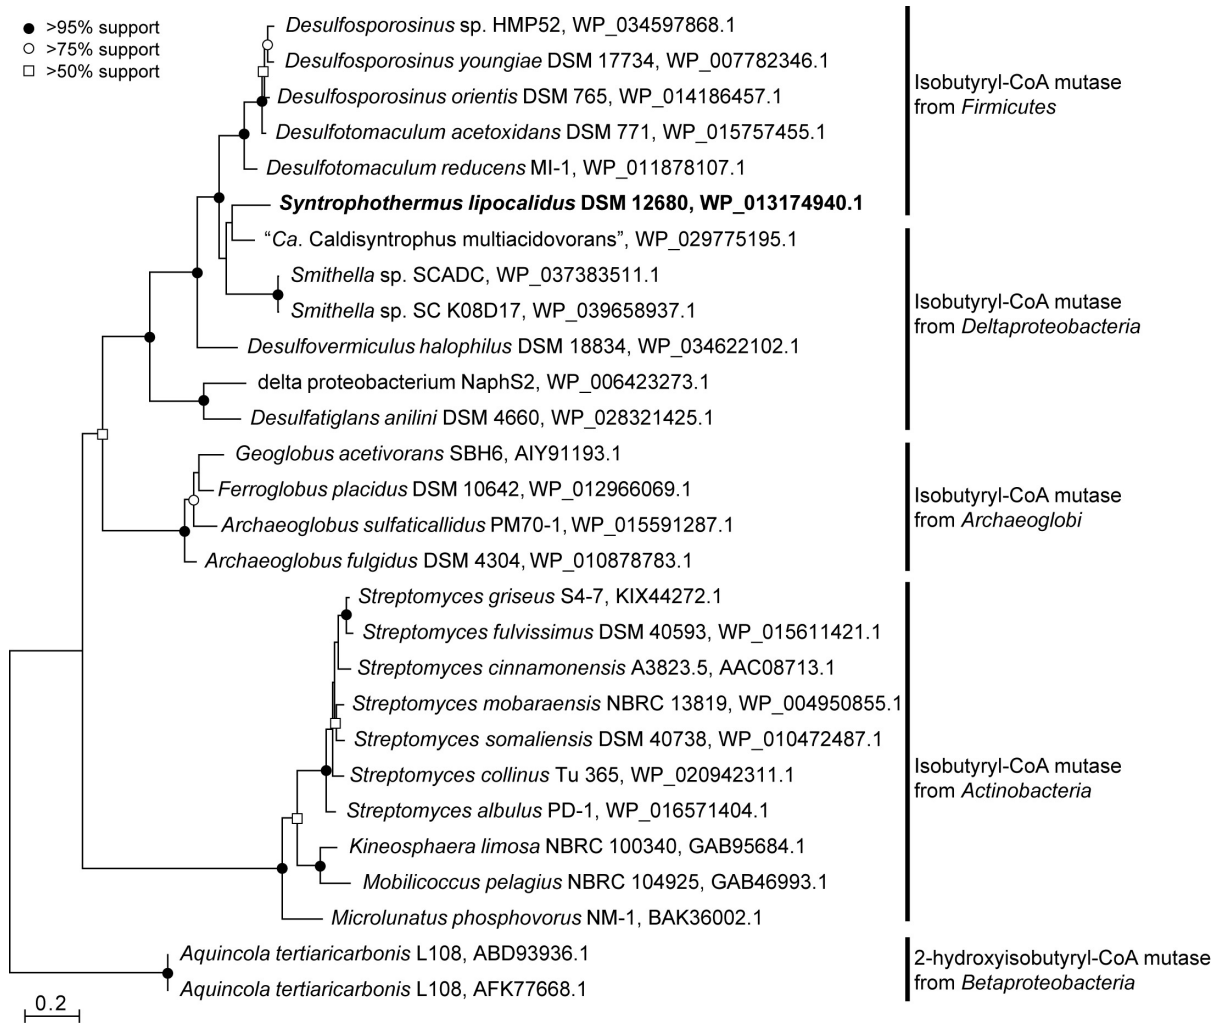

93 **Fig. S2.** A maximum likelihood tree of isobutyryl-CoA mutase. The topology of the tree was  
 94 estimated by bootstrap analysis with 1,000 replicates. Bar indicates 0.2 change per amino  
 95 acid site.



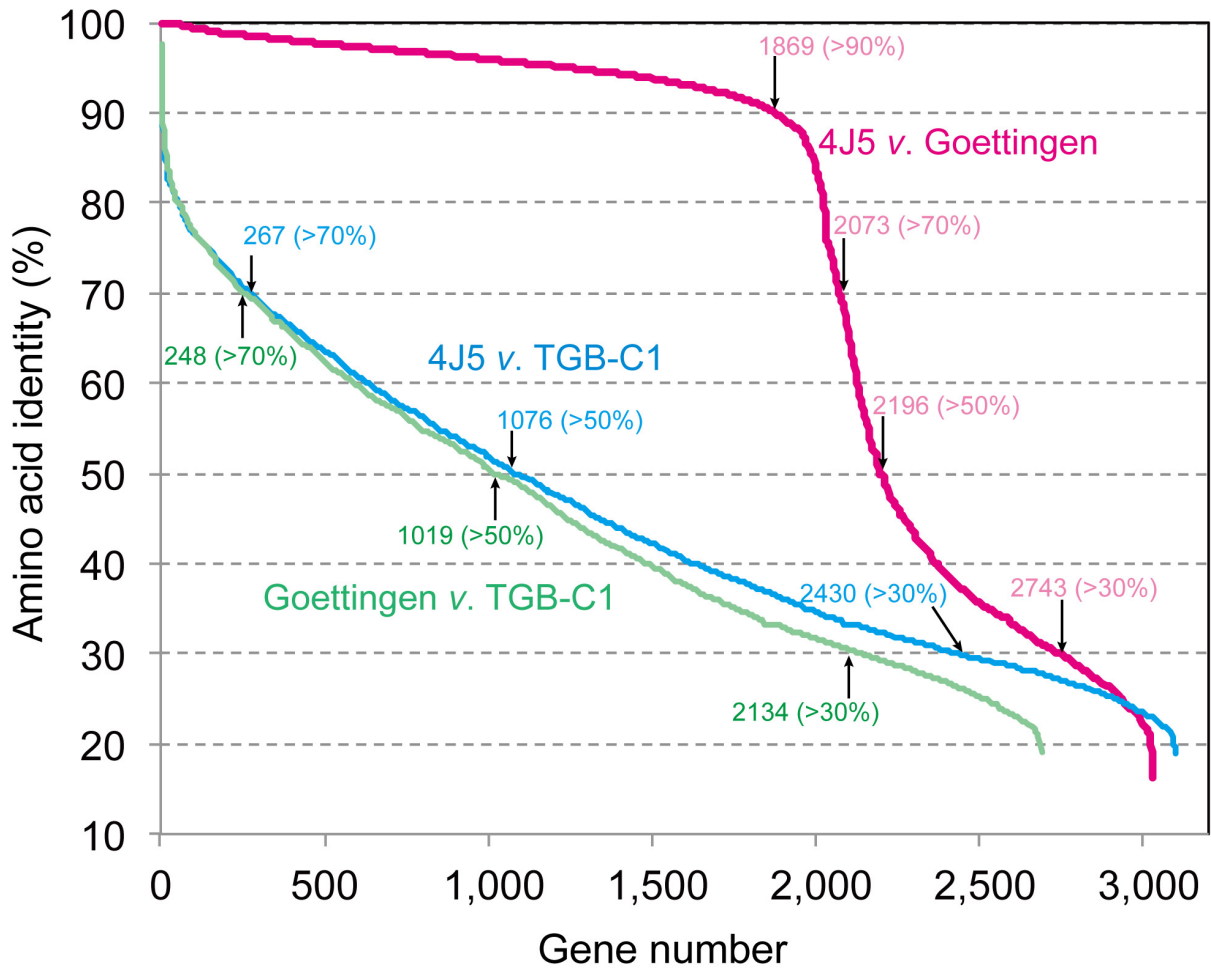

98 **Fig. S3.** Comparison of amino acid identities between the genome of “*Syntrophomonas*  
 99 *wolfei* subsp. *methylbutyratica*” strain 4J5, *Syntrophomonas wolfei* subsp. *wolfei* strain  
 100 Göttingen, and *Syntrophothermus lipocalidus* strain TGB-C1.

101

102

103 **Supplemental material.** Amino acid sequences of annotated proteins within the genome of  
 104 *Syntrophomonas wolfei* subsp. *methylbutyratica* strain 4J5.

105

106 **Supplemental references**

107

- 108 1. Amos, D.A., and M.J. McInerney. 1989. Poly- $\beta$ -hydroxyalkanoate in *Syntrophomonas wolfei*.  
109 Arch. Microbiol. 152:172-177.
- 110 2. Beaty, P.S., and M.J. McInerney. 1989. Effects of organic-acid anions on the growth and  
111 metabolism of *Syntrophomonas wolfei* in pure culture and in defined consortia. Appl.  
112 Environ. Microbiol. 55:977-983.
- 113 3. Djao, O.D.N., X.J. Zhang, S. Lucas, *et al.* 2010. Complete genome sequence of  
114 *Syntrophothermus lipocalidus* type strain (TGB-C1(T)). Stand. Genomic Sci. 3:267-275.
- 115 4. Felsenstein, J. 1985. Confidence-limits on phylogenies - an approach using the bootstrap.  
116 Evolution. 39:783-791.
- 117 5. Felsenstein, J. 1981. Evolutionary trees from DNA sequences: a maximum likelihood  
118 approach. J. Mol. Evol. 17:368-376.
- 119 6. Grissa, I., G. Vergnaud, and C. Pourcel. 2007. The CRISPRdb database and tools to display  
120 CRISPRs and to generate dictionaries of spacers and repeats. BMC Bioinformatics. 8:172.
- 121 7. Jones, D.T., W.R. Taylor, and J.M. Thornton. 1992. The rapid generation of mutation data  
122 matrices from protein sequences. Comput Appl Biosci. 8:275-82.
- 123 8. McInerney, M.J., and N.Q. Wofford. 1992. Enzymes involved in crotonate metabolism in  
124 *Syntrophomonas wolfei*. Arch. Microbiol. 158:344-349.
- 125 9. Schmidt, A., N. Muller, B. Schink, and D. Schleheck. 2013. A proteomic view at the  
126 biochemistry of syntrophic butyrate oxidation in *Syntrophomonas wolfei*. PLoS One.  
127 8:e56905.
- 128 10. Seemann, T. 2014. Prokka: rapid prokaryotic genome annotation. Bioinformatics. 30:2068-  
129 2069.

- 130 11. Sieber, J.R., D.R. Sims, C. Han, *et al.* 2010. The genome of *Syntrophomonas wolfei*: new  
131 insights into syntrophic metabolism and biohydrogen production. *Environ. Microbiol.*  
132 12:2289-2301.
- 133 12. Sorek, R., V. Kunin, and P. Hugenholtz. 2008. CRISPR--a widespread system that provides  
134 acquired resistance against phages in bacteria and archaea. *Nat. Rev. Microbiol.* 6:181-186.
- 135 13. Sorek, R., C.M. Lawrence, and B. Wiedenheft. 2013. CRISPR-mediated adaptive immune  
136 systems in bacteria and archaea. *Annu. Rev. Biochem.* 82:237-266.
- 137 14. Takahashi, K., and M. Nei. 2000. Efficiencies of fast algorithms of phylogenetic inference  
138 under the criteria of maximum parsimony, minimum evolution, and maximum likelihood  
139 when a large number of sequences are used. *Mol. Biol. Evol.* 17:1251-8.
- 140 15. Tamura, K., G. Stecher, D. Peterson, A. Filipski, and S. Kumar. 2013. MEGA6: Molecular  
141 Evolutionary Genetics Analysis version 6.0. *Mol. Biol. Evol.* 30:2725-2729.
- 142 16. Wu, C., X. Dong, and X. Liu. 2007. *Syntrophomonas wolfei* subsp. *methylbutyratica* subsp.  
143 nov., and assignment of *Syntrophomonas wolfei* subsp. *saponavida* to *Syntrophomonas*  
144 *saponavida* sp. nov. comb. nov. *Syst. Appl. Microbiol.* 30:376-380.













































































MGEKNIPLVTFNAGYELQIPLYLKILKSAVYMSGSHETFLPSTLIDGSEVILDFDFTFSTNIVKIEFSTFVSNVKNPKMDVAGDQYEVATYVAVSNPNIAHFFHGQGL SOGGLDLSARHATKLSHIFHATNEVSNRBLKEEWFVAVGSTVFNEDVSTYFHELNDLNDLKKVLPITQHLITPTEQKADQKSKLQVLAJGQISPTVNDNSGEMK  
<...>
